# Supplementary material for: Keratinocytes contribute to normal cold and heat sensation
Source: eLife. 2020 Jul 30;9:e58625. doi: 10.7554/eLife.58625 (PMC7402674; doi:10.7554/eLife.58625)
Supplement: Source data 1. [file elife-58625-data1.xlsx]

## Sheet: Fig 1C
mouse	squirrel	human	rat
42.6074	83.9273	68.1805	32.9861
55.8509	63.4691	32.1722	56.6635
71.0425	76.4693	30.3909	34.3622
62.1327	65.4153	50.1566	47.3358
53.0622	83.9563	57.1615	32.2581
38.5247	53.6661	80.2191	53.453
50.2519	67.9217	45.8683	30.9011
57.7365	71.4223	43.6329	33.7278
42.3122	85.416	44.8462	63.2817
40.7507	81.1955	68.146	32.8385
52.2156	59.3118	30.8561	46.1285
65.2851	60.945	38.7917	52.3629
39.3902	33.2427	38.0219	39.9184
32.9238	52.0948	46.7291	41.5889
44.9905	61.988	39.7289	33.0909
43.4794	66.9065	30.6387	35.5912
43.6066	49.409	63.0859	32.2686
34.5664	61.8391	59.1926	30.895
	51.33	62.0434	33.3333
68.4481	63.8972	104.099	31.5417
50.2105	37.2242	61.4971	31.6999
50.8147	62.6813	55.6484	39.2554
37.4011	56.0731	61.9333	30.0477
39.4713	72.4223	31.8559	32.4941
	76.3329	68.6004	30.0559
45.4305	73.1403	57.4775	45.4111
39.8562	58.3756	81.9674	41.2727
49.8285	57.3729	69.569	38.3706
36.6568	47.0795	33.0693	33.5603
53.3293	38.502	38.6193	45.9139
46.8957	46.9922	42.0382	31.4581
48.9085	60.7104	57.9203	35.7332
44.0232	58.5732	70.1638	58.426
48.1217	57.2741	45.6805	32.9262
32.6856	60.378	42.229	34.3561
44.8363	40.7432	62.3535	62.7657
43.9376	55.9296	48.3092	30.3162
42.2478	34.9614	68.7116	32.0722
55.0327	74.4885	58.5062	32.7278
56.692	38.8506	37.7002	32.8683
48.8972	45.4933	50.1867	32.3008
61.1316	37.0346	59.2522	46.487
35.3721	51.8844	85.7647	36.771
30.5103	33.7737	67.3524	31.1177
36.2003	40.824	32.707	30.1137
51.2462	43.1465	49.762	33.8143
38.1859	40.389	44.2424	30.8305
45.577	41.0501	50.1508	34.1414
42.0431	33.1414	42.8284	33.6493
33.472	39.126	52.5027	30.0578
	41.4036	46.6635	49.9425
40.4867	48.6935	44.4234	33.6715
45.8264	39.9804	35.9855	37.6278
	35.8993	45.4122	31.2899
36.9404	37.6407	49.8375	31.6579
34.7976	43.3681	38.5256	32.7522
42.8603	47.6395	77.5514	69.4339
61.3932	48.181	66.95	59.5931
55.3398	68.9852	92.1233	53.8047
52.9595	51.4199	36.4083	34.1679
43.9306	36.5023	33.6588	63.3657
77.6776	53.7952	48.3851	34.863
77.1132	56.8421	69.3426	41.9503
84.3543	50.2732	88.7092	48.2032
56.1967	53.1719	56.8673	37.5643
	38.8469	46.5943	40.3333
39.9476	49.2651	74.2675	31.3337
61.1445	59.025	35.5512	51.9324
54.9617	34.9723	51.5073	33.3333
51.3284	47.4642	73.6807	50.3109
45.3771	45.4159	53.336	32.4038
39.1482	44.9787	93.8342	46.9287
49.0125	57.1335	67.9748	51.1443
47.5332	46.136	73.2264	45.291
55.6218	33.7144	58.6381	37.9471
37.6046	70.5737	72.4462	39.0241
49.9504	101.798	45.3911	34.5243
51.0422	80.3482	115.849	43.7337
49.1087	73.0633	36.4695	40.7937
45.1596	63.2974	81.9329	34.5679
49.7886	86.8928	82.0647	42.8413
35.4177	39.5815	35.1246	32.655
41.9795	63.3291	65.5429	40.0752
41.0983	75.9712	59.4135	65.7069
47.9268	69.9126	74.2632	67.1236
49.1039	52.9631	40.7155	61.7728
43.6422	81.8599	32.3477	36.9555
60.2967	89.8272	31.5037	38.0234
66.5109	55.1418	39.2413	43.6966
35.2417	66.7087	35.7485	30.5768
77.8709	75.0932	36.7584	42.0018
51.3875	54.8694	30.2404	58.6684
47.7162	45.6145	39.9032	35.361
46.087	90.8392	31.0108	49.0196
47.8985	66.0589	41.9099	39.6931
41.429	47.0511	49.3808	39.4748
55.2814	62.4847	41.8082	36.7469
49.4157	47.1679	46.8895	48.7135
56.9937	62.1074	57.9227	51.7241
50.4553	57.476	43.0311	50.8757
34.1116	78.8423	52.7607	39.9855
49.5695	61.9009	59.2226	44.6232
55.231	56.2279	82.5079	39.3053
34.2804	52.8625	55.2814	44.5809
40.6601	41.1694	34.9177	42.084
38.0856	48.2541	34.5418	43.1115
41.8815	58.8653	94.4487	37.8358
	77.9994	66.2727	45.6574
40.0751	75.072	58.2356	50.8441
46.503	80.9291	33.1076	54.8013
40.4541	68.4717	38.6544	43.3319
44.2501	49.2925	34.7193	32.5376
41.4901	68.4732	61.5391	43.2014
42.6999	52.4854	31.8033	35.3405
44.8147	59.3062	30.967	33.5775
51.8881	44.5909	52.7635	34.2024
38.4251	45.543	31.4907	36.4869
50.0737	87.9949	43.2804	37.6503
56.4209	69.8576	49.1157	45.0228
67.0878	40.5178	53.7255	77.353
65.5757	51.8313	35.2561	53.6336
50.5547	70.2395	45.5507	42.545
64.6002	83.8237	77.5813	45.486
47.243	56.2331	36.1197	43.4749
48.5	52.8522	60.3175	48.9075
35.0242	51.4379	54.999	56.7827
33.6489	66.5175	30.7829	49.7733
	98.4619	59.782	51.5579
30.3869	92.9812	59.7386	47.4469
	72.1276	48.1219	51.4656
40.1205	39.4118	33.2909	93.5307
42.5641	47.6154	34.4398	35.2263
32.812	46.2664	36.4434	49.8308
40.4756	66.3702	118.447	38.3145
44.3302	70.5737	90.9891	35.5089
44.3747	101.798	55.61	32.9929
43.9544	80.3482	45.2928	32.4877
41.6614	73.0633	40.7925	51.4087
40.4957	63.2974	52.9836	30.5847
43.4364	86.8928	37.2923	34.5869
44.6293	39.5815	65.5542	31.5688
34.685	63.3291	47.8566	40.5514
	75.9712	39.0033	36.4895
49.2031	69.9126	48.7235	32.1302
53.5142	52.9631	83.4377	35.0661
56.9609	81.8599	31.4144	37.6243
38.133	89.8272	35.0797	33.9374
39.2067	55.1418	40.1307	30.3743
44.9701	66.7087	51.6638	37.5371
38.8376	75.0932	32.668	32.6784
39.8146	54.8694	33.214	34.7464
37.779	45.6145	53.3008	37.7076
39.8663	90.8392	33.4622	32.4827
44.6872	66.0589	38.2488	33.4909
47.5165	47.0511	53.4809	45.9892
51.1806	62.4847	50.1882	30.8299
45.7382	47.1679	35.8297	41.8815
52.8064	62.1074	38.0334	37.5131
43.2031	57.476	132.368	35.1762
58.1153	78.8423	42.9359	32.3961
59.3821	61.9009	30.1613	33.4358
37.6038	56.2279	36.0503	36.2429
37.5726	52.8625	51.8664	47.422
51.4965	41.1694	35.0877	45.0926
41.1279	48.2541	33.5382	35.8471
52.4599	58.8653	50.1386	43.4234
40.0491	77.9994	34.533	34.2578
43.319	75.072	37.679	37.5605
61.1846	80.9291	34.959	31.4982
65.4651	68.4717	111.15	30.8917
52.8787	49.2925	37.9486	48.058
61.543	68.4732	33.9028	47.6743
45.3526	52.4854	43.1017	34.4371
60.7621	59.3062	43.6046	33.3333
51.9076	44.5909	35.1019	43.5718
48.8757	45.543	47.7358	34.0776
46.8646	87.9949	34.4091	62.436
52.4559	69.8576	35.9148	34.5736
44.8511	40.5178	34.7993	49.7058
41.9647	51.8313	39.781	36.9486
54.0913	70.2395	36.8192	34.0218
33.7763	83.8237	98.9995	33.4975
60.4408	56.2331	68.8073	38.7135
50.5752	52.8522	68.0325	70.5767
31.4053	51.4379	56.5936	30.6143
	66.5175	47.5511	38.7879
47.4346	98.4619	106.1	40.4995
45.4196	92.9812	110.907	34.8396
34.6399	72.1276	137.764	34.7557
56.1874	39.4118	53.1104	35.6573
35.3076	47.6154	42.83	65.8015
46.1343	46.2664	53.9868	38.337
50.9351	66.3702	38.1502	32.0159
43.901	70.5737	73.0172	32.5581
39.6	101.798	46.6993	30.9201
48.1979	80.3482	93.4783	30.0302
65.4417	73.0633	47.6577	37.9922
51.8981	63.2974	41.8454	41.5092
51.1514	86.8928	36.9979	30.2632
38.2972	39.5815	46.8283	30.2845
39.9919	63.3291	52.8779	53.9229
51.7709	75.9712	93.1257	32.8582
54.2478	69.9126	99.6973	35.883
52.2924	52.9631	49.7129	34.321
58.1662	81.8599	76.1989	31.5618
62.6947	89.8272	48.6237	33.5399
65.8196	55.1418	40.5654	33.3333
58.4532	66.7087	36.8302	37.2246
57.1407	75.0932	34.9988	32.61
71.0381	54.8694	44.1253	31.6717
47.8904	45.6145	52.5596	30.8756
35.9535	90.8392	127.595	36.4103
50.996	66.0589	40.599	34.3342
60.2006	47.0511	88.3568	45.5126
57.6841	62.4847	100.036	48.798
51.0769	47.1679	47.5253	32.1373
50.264	62.1074	57.1753	35.7173
48.3129	57.476	49.6061	36.7494
41.8056	78.8423	40.8794	35.3734
61.095	61.9009	65.5761	35.1641
62.5457	56.2279	51.9628	39.1788
61.4918	52.8625	48.8492	36.0912
54.7028	41.1694	30.1461	31.9843
50.4582	48.2541	147.658	30.5024
72.3733	58.8653	38.1624	37.5092
38.9547	77.9994	31.9786	43.1943
56.8822	75.072	47.0958	40.4383
43.5944	80.9291	39.2609	32.1473
40.2691	68.4717	38.5209	34.7722
65.5027	49.2925	46.544	35.0286
56.2815	68.4732	54.0863	75.5289
38.7652	52.4854	82.7023	72.1297
49.8112	59.3062	46.2763	62.7101
54.1174	44.5909	43.8211	51.5351
65.8949	45.543	34.492	44.5133
54.9082	87.9949	46.8053	65.1702
54.6301	69.8576	32.4799	36.6309
87.5737	40.5178	76.3044	47.9815
50.1019	51.8313	32.1652	47.5665
44.6357	70.2395	31.6146	56.4472
53.509	83.8237	38.0364	50.1843
41.5398	56.2331	32.371	62.5296
76.2924	52.8522	46.3677	53.3055
	51.4379	31.6676	44.1062
	66.5175	37.5257	57.9727
	98.4619	32.4948	56.0645
	92.9812	38.261	34.5054
	72.1276	48.4571	98.557
	39.4118	30.678	40.4623
	47.6154	30.7406	36.8497
	46.2664	40.2748	45.5046
	66.3702	38.9053	34.8934
	80.2767	118.385	52.429
	79.1565	64.4374	61.7728
	55.0357	57.3731	39.6606
	85.8513	43.7721	33.9764
	62.9765	60.6358	42.4831
	64.8818	55.5881	65.2482
	55.7178	57.2427	64.4664
	93.3243	40.8984	73.9558
	82.6873	61.7909	56.8811
	74.2562	52.6847	41.3855
	55.5653	49.4552	53.5186
	108.857	35.5493	43.5451
	93.9394	41.0939	46.3402
	50.1288	93.887	59.6166
	69.1105	30.1197	50.3162
	85.9267	39.829	50.3214
	52.9199	378.377	36.0179
	76.7154	42.7655	44.4664
	63.6427	44.3061	61.9496
	67.4954	54.0294	42.3158
	68.5199	71.5597	38.8965
	69.0467	84.8485	30.4659
	54.4297	67.3944	37.8624
	59.8434	44.7532	64.2512
	77.2681	35.1092	68.9888
	87.5688	34.6483	77.7149
	74.6595	40.8663	50.7495
	93.2297	35.591	52.7204
	70.5378	140.321	45.8317
	65.0196	30.6505	45.4181
	84.4351	45.1791	37.386
	123.573	152.306	41.0276
	71.3737	61.6187	40.4402
	67.2253	46.2647	47.9617
	86.2216	68.2571	43.4468
	48.2611	118.885	37.3127
	56.0295	34.3826	34.2021
	46.0479	50.7171	47.194
	110.452	38.1667	32.0588
	79.3752	30.4308	41.1429
	35.6449	51.0921	45.9209
	68.5351	31.9278	44.1617
	73.4925	30.4284	42.8252
	102.231	35.2703	47.7304
	86.1423	31.1804	43.1608
	98.814	87.2375	45.5016
	66.237	58.8749	41.964
	72.9469	35.8348	33.3333
	70.1967	38.9671	33.47
	98.7184	34.089	47.5389
	102.759	35.5759	43.8692
	75.958	72.9934	47.1097
	74.9922	81.6231	46.7707
	66.3564	38.0111	57.8851
	92.2298	69.3491	46.6853
	191.57	89.158	62.5471
	392.893	36.5763	39.364
	212.22	30.5034	44.6074
	447.235	32.5885	36.1039
	1040.14	31.3611	37.2405
	93.9061	46.2078	46.8788
	118.803	71.5465	31.5054
	123.801	31.2958	40.5727
	137.838	50.7953	38.7766
	189.138	30.7474	46.1417
	143.26	41.279	62.6259
	100.922	33.6336	46.8482
	94.8981	38.4004	44.3852
	129.362	33.2979	36.5102
	92.2039	33.4957	30.2004
	89.6319	33.5443	52.968
	56.2713	38.3715	47.8673
	60.4799	212.208	35.1339
	158.143	65.0877	45.6747
	73.5259	187.104	34.3561
	82.108	50.8706	37.6257
	72.1987	61.9814	76.2151
	73.7078	49.5878	32.5834
60.7625	71.3018	86.0185	58.9812
37.6978	69.9975	115.737	34.0718
38.5583	123.067	67.7182	46.6568
40.7278	60.542	41.7054	38.2753
46.688	49.9882	46.5375	43.8029
38.8109	142.02	63.3588	62.5069
43.9742	165.394	184.576	34.7447
	101.308	34.913	50.65
	117.162	31.8029	61.1011
41.9201	162.001	41.7442	31.1185
48.5773	248.938	31.2291	43.1413
	190.132	31.0976	56.2972
38.1568	532.503	32.464	35.5239
39.1272	177.02	58.345	40.6617
47.3304	119.748	50.6147	35.6552
57.3303	211.111	78.5499	49.9462
50.2172	158.874	244.112	36.3005
37.4851	103.609	76.0431	33.526
41.0809	162.114	33.6403	34.5786
52.3994	34.4691	203.131	49.1351
32.1496	167.635	90.626	45.8563
53.405	70.7191	99.7725	40.8407
43.0297	103.881	67.9233	37.4811
31.701	72.1334	62.921	41.2349
49.5791	52.0563	75.9543	54.6809
39.7512	84.5562	75.583	38.5595
34.1473	105.38	38.9142	46.3535
41.6244	66.2324	81.5153	40.2097
35.0388	64.3709	70.7403	38.9996
36.4603	79.4653	93.2945	37.8503
	64.6134	39.524	39.4203
	125.498	38.451	52.9451
32.228	61.0601	48.7134	40.122
40.7022	35.0928	44.4341	56.2434
45.1324	64.2225	36.602	59.2681
33.5526	76.0978	62.0752	54.2353
33.2167	108.45	41.4107	44.0722
	74.7681	73.8272	46.3612
33.0913	115.851	34.633	50.8833
31.8771	97.6656	115.544	59.4419
37.0201	62.7642	72.1249	109.576
40.7109	74.4022	52.2444	83.4781
33.0504	57.3237	31.888	59.1787
30.0015	51.7193	50.1493	45.0484
	84.1727	83.1516	39.7287
32.564	62.1705	98.1033	43.5619
30.2972	68.367	31.0563	45.6547
33.3053	84.8791	35.0435	37.1544
33.0846	76.1905	84.429	49.7614
36.8287	41.7426	45.9119	44.3126
31.8078	54.103	30.9505	32.3748
38.6155	81.8482	54.3185	41.791
46.2038	51.1199	30.5233	58.6912
32.9673	70.3465	251.674	42.0644
32.9281	84.4921	41.4344	44.6074
34.9243	70.671	33.8335	36.1039
30.5953	115.747	60.7743	37.2405
	71.7164	54.0292	46.8788
35.5501	63.2916	34.0512	31.5054
31.7735	82.5338	47.1225	40.5727
45.9978	71.3024	39.5921	38.7766
33.1704	64.2289	30.0257	46.1417
	81.2017	48.4559	62.6259
35.8522	56.7664	43.2386	46.8482
	62.0812	268.696	44.3852
51.5361	77.2651	41.7426	36.5102
59.8178	66.8233	51.7384	30.2004
31.4842	66.2376	64.1932	52.968
43.8292	70.5942	31.1971	47.8673
	65.5773	74.1284	35.1339
	65.224	115.596	45.6747
39.7416	78.1795	100.639	34.3561
36.5357	63.3464	33.4328	37.6257
48.1985	52.0249	40.8595	76.2151
38.4892	41.0034	42.3905	32.5834
43.4308	42.0496	45.8798	58.9812
35.9361	48.7541	35.5821	34.0718
	31.8052	32.2021	46.6568
50.2902	35.4596	45.2537	38.2753
	30.8142	306.31	43.8029
	64.4344	54.7314	62.5069
30.7711	50.1996	66.4685	34.7447
35.3135	59.4074	76	50.65
	84.769	68.1908	61.1011
32.4944	44.4152	92.0746	31.1185
32.7553	61.0601	30.843	43.1413
37.7039	35.0928	41.7574	56.2972
35.207	64.2225	33.7577	35.5239
38.3997	76.0978	31.566	40.6617
79.8029	108.45	35.9513	35.6552
31.914	74.7681	40.4361	49.9462
30.4524	115.851	34.2771	36.3005
33.9051	97.6656	41.8907	33.526
36.8371	62.7642	51.5378	34.5786
	74.4022	42.1727	49.1351
32.8659	57.3237	131.694	45.8563
33.984	51.7193	61.9378	40.8407
	84.1727	32.615	37.4811
	62.1705	32.8238	41.2349
32.1598	68.367	32.1009	54.6809
	84.8791	46.3741	38.5595
	76.1905	45.6166	46.3535
31.3542	41.7426	47.0304	40.2097
37.4043	54.103	105.145	38.9996
31.1333	81.8482	99.4126	37.8503
34.5248	51.1199	135.859	39.4203
	70.3465	50.8185	52.9451
31.5162	84.4921	52.2541	40.122
	70.671	46.8718	56.2434
	115.747	32.6348	59.2681
	71.7164	43.903	54.2353
	63.2916	33.1242	44.0722
30.5877	82.5338	48.6983	46.3612
33.123	71.3024	65.91	50.8833
31.9085	64.2289	113.333	59.4419
30.7813	81.2017	33.2259	109.576
33.7656	56.7664	68.0659	83.4781
37.4511	62.0812	42.2703	59.1787
32.9006	77.2651	71.7321	45.0484
	66.8233	53.6996	39.7287
35.9187	66.2376	40.2787	43.5619
	70.5942	108.03	45.6547
35.0676	65.5773	42.53	37.1544
34.5007	65.224	40.3358	49.7614
32.1829	78.1795	70.5197	44.3126
	63.3464	43.9326	32.3748
30.063	52.0249	37.8989	41.791
	41.0034	39.9445	58.6912
	42.0496	51.2598	42.0644
	48.7541	30.8145
	31.8052	55.3025
41.3862	35.4596	32.8063
	30.8142	49.1474
	64.4344	53.2118
	50.1996	62.1306
38.4394	59.4074	36.2366
	84.769	42.3811
	44.4152	70.3935
	83.9732	35.6009
51.7799	74.1262	47.0636
31.1568	76.6373	45.5009
	70.9024	63.4361
31.0115	72.7686	35.2574
40.9595	69.2528	34.7241
37.7054	97.3228	71.1268
39.7027	70.3924	51.7129
38.3119	61.8507	43.2142
37.5767	70.1985	79.8191
31.8724	65.0101	63.3702
37.9115	79.2512	38.5885
38.5432	72.9363	42.6929
	69.4474	48.115
	107.996	49.1296
45.7995	41.7207	32.6208
36.3231	60.4073	34.8948
43.9673	92.3238	36.7464
38.4114	83.2924	38.1086
40.5275	190.413	65.4295
	128.778	40.0143
32.8233	94.2286	38.5243
	59.9148	45.679
32.1932	57.9314	40.1929
30.9885	41.8136	39.2946
48.3027	52.3384	31.9887
31.0345	30.0032	39.378
41.5379	145.364	52.7476
44.5091	97.6488	52.7829
34.2835	58.1537	44.7194
	62.5065	33.1132
43.6275	100.369	35.9451
59.9475	97.4481	97.4857
43.6326	54.7254	45.9204
	75.0617	31.1753
55.4168	71.4533	34.2552
33.3333	47.3835	32.2789
41.0611	40.4335	48.9591
35.7185	97.0127	73.3724
45.8243	56.3743	44.1702
30.9246	98.493	39.2623
37.3459	80.7509	76.1616
51.2527	77.1557	127.838
38.4649	72.516	156.318
51.842	101.908	54.0825
63.1089	92.9856	46.9836
53.286	122.001	34.6784
50.3687	54.6125	59.4178
52.0714	80.7399	80.1486
33.5616	49.109	38.8522
35.607	83.9732	108.502
	74.1262	101.863
	76.6373	43.0831
	70.9024	95.1848
44.9078	72.7686	51.9317
52.8327	69.2528	38.4189
58.0373	97.3228	82.9212
43.2983	70.3924	44.5324
46.8249	61.8507	72.7766
47.5768	70.1985	31.6831
38.0303	65.0101	58.428
	79.2512	54.9651
37.2296	72.9363	45.4225
36.7267	69.4474	51.7302
34.7706	107.996	41.8872
38.1907	41.7207	39.1335
44.1441	60.4073	63.6745
45.7523	92.3238	41.891
46.3151	83.2924	58.271
40.8818	190.413	34.3662
44.1655	128.778	41.8285
49.8811	94.2286	41.0273
35.2283	59.9148	53.7766
31.9623	57.9314	67.8351
53.8181	41.8136	69.2754
47.1541	52.3384	142.524
56.9432	30.0032	39.9812
53.141	145.364	46.8184
36.1722	97.6488	60.0168
41.8221	58.1537	66.1326
55.6809	62.5065	69.4506
45.5799	100.369	106.6
34.4768	97.4481	58.0942
	54.7254	36.7936
48.53	75.0617	35.443
33.467	71.4533	35.5735
32.2723	47.3835	34.7974
	40.4335	46.6718
	97.0127	44.9353
	56.3743	62.4637
33.0903	98.493	56.0684
36.8421	80.7509	37.5294
38.2051	77.1557	31.637
35.6818	72.516	85.6457
37.9256	101.908	54.6961
48.4989	92.9856	36.8554
	122.001	34.6559
	54.6125	38.415
31.5267	80.7399	56.7523
35.6847	49.109	56.842
35.5714	54.5151	36.6284
34.0441	85.3375	36.005
45.6033	52.7607	35.1391
40.9127	105.358	47.1426
63.6002	113.778	42.0746
30.6488	98.4538	34.5558
34.1436	78.8132	31.6845
50.4181	84.0542	54.534
44.4638	117.596	96.8418
56.3619	147.522	32.8179
48.3946	78.5441	51.3794
59.6968	60.1776	35.9094
46.8708	43.3381	78.4621
46.6977	53.1832	44.3159
33.3719	92.5569	34.0181
45.7918	158.279	49.615
62.524	149.125	40.7819
69.3135	55.4281	125.908
30.46	69.5227	127.762
49.3629	52.547	53.3886
47.753	66.6439	105.257
67.326	73.9289	170.589
71.5747	78.4404	52.26
45.2333	60.1978	48.9404
49.5992	60.771	45.818
142.098	66.9598	65.5262
95.8006	83.1776	68.2316
55.2995	124.85	66.4269
67.1827	49.1674	54.8413
84.4514	134.855	145.813
55.8211	97.8329	89.0211
45.941	46.834	103.33
	76.2901	52.2489
35.0482	63.1529	88.8508
	32.4564	77.561
41.1807	62.8143	55.4591
52.0167	51.5066	149.475
35.687	79.1355	44.123
36.5765	92.1714	50.4656
30.5542	56.7235	116.954
	72.4643	77.746
40.0861	75.3467	49.8891
36.9233	91.7205	64.7799
30.4911	73.5464	102.061
46.4195	38.7569	55.5965
40.5981	54.475	42.3196
49.1555	71.6946	66.7504
33.1173	65.4618	32.3728
64.2689	110.759	97.9868
58.7488	53.1443	52.2062
64.9775	60.4511	34.849
58.8789	61.7813	91.3655
72.994	69.7662	100.39
68.043	91.5252	42.832
62.606	71.2661	36.5385
60.7362	47.2053	63.8554
66.8648	51.4541	55.9767
71.0549	40.6195	56.687
30.4435	79.8619	31.6179
47.2554	111.073	30.7608
70.7786	67.6405	41.2381
63.1008	119.023	43.4948
43.544	66.6976	92.2171
42.1934	52.7701	42.7788
30.9745	37.6397	33.5172
34.4468	79.6319	48.5318
34.7136	80.3596	112.232
57.5185	82.7532	59.0963
50.0911	77.2874	51.4862
35.3975	76.2901	31.5255
34.0058	63.1529	36.4198
41.0083	32.4564	76.1542
51.7927	62.8143	56.5473
40.5622	51.5066	85.8443
49.1675	79.1355	102.305
52.4225	92.1714	31.8152
42.5802	56.7235	63.6232
33.8365	72.4643	138.011
38.965	75.3467	108.895
	91.7205	77.3996
30.5232	73.5464	30.3704
33.9713	38.7569	110.369
39.6583	54.475	149.136
38.5876	71.6946	60.7557
46.9066	65.4618	79.209
37.4286	110.759	155.733
47.0929	53.1443	112.062
61.2143	60.4511	37.0958
44.4377	61.7813	58.8612
48.4945	69.7662	89.5421
38.2607	91.5252	79.8558
49.0236	71.2661	104.749
53.1608	47.2053	45.5469
45.3683	51.4541	72.7979
81.3119	40.6195	87.0576
61.4143	79.8619	38.7681
62.1699	111.073	153.353
	67.6405	144.931
41.1318	119.023	99.8951
57.0559	66.6976	72.6588
46.1538	52.7701	114.307
51.2623	37.6397	60.0929
49.9553	79.6319	173.906
79.2176	80.3596	153.424
46.1261	82.7532	44.1679
44.4349	77.2874	102.087
50.3328	76.2901	66.5827
56.4349	63.1529	48.9385
67.0747	32.4564	143.214
41.2005	62.8143	110.061
74.2879	51.5066	136.322
68.0241	79.1355	77.6337
39.5418	92.1714	108.267
55.2685	56.7235	207.133
100.629	72.4643	119.448
64.3658	75.3467	155.623
43.7558	91.7205	110.197
36.5681	73.5464	107.282
51.7252	38.7569	46.9777
54.0913	54.475	47.7561
55.5427	71.6946	81.9405
33.4725	65.4618	79.1052
	110.759	55.595
57.7591	53.1443	44.749
68.8914	60.4511	115.633
62.2344	61.7813	73.0553
52.5551	69.7662	144.552
61.1355	91.5252	101.841
	71.2661	129.301
38.4792	47.2053	192.42
41.2406	51.4541	145.956
73.7808	40.6195	91.2138
41.1854	79.8619	112.691
54.0856	111.073	104.873
42.362	67.6405	106.649
58.5611	119.023	46.396
53.6847	66.6976	98.4357
76.4565	52.7701	144.739
69.3012	37.6397	56.2104
63.2327	79.6319	112.241
65.1613	80.3596	55.7731
63.4121	82.7532	78.7387
45.4545	77.2874	88.7165
83.2066		156.279
81.1976		67.4847
		106.258
		131.624
52.4835		108.182
35.941		91.9982
		130.57
		97.0974
49.4199		126.733
49.6501		95.7149
61.1713		130.36
34.9585		123.396
59.8625		90.5748
44.9258		37.946
56.5669		62.4487
37.2785		100.17
47.7094		78.3889
65.8505		60.4446
63.937		49.9335
52.8068		60.2018
49.2493		90.6381
30.6415		101.328
50.1733		95.5972
38.9213		89.6137
40.8724		110.353
72.8756		72.8809
50.6651		75.991
51.4376		149.336
55.3603		136.619
42.2438		82.9246
48.3308		134.795
62.3159		54.913
39.6401		41.0273
40.0112		75.5968
45.2889		61.9873
76.393		47.6101
75.5629		86.184
54.066		121.276
50.9896		60.7843
47.4924		30.7083
52.6442		207.371
34.418		71.6713
50.9246		222.034
53.3917		56.3586
58.4481		44.8856
59.4421		55.0858
50.8433		137.65
57.254		71.3153
56.553		161.634
47.8601		33.5747
56.0944		87.2808
42.7196		82.967
60.088		158.226
40.9583		83.7954
38.7291		38.024
30.2359		97.5793
42.4483		104.479
60.5785		82.9308
112.944		331.339
54.6284		189.647
50.1173		80.0056
47.0772		68.5628
44.8936		52.5203
35.1549		136.573
37.7578		183.755
42.1369		169.642
48.5507		138.024
51.9275		136.276
42.6858		139.578
55.2274		118.22
83.279		106.392
53.5219		205.757
48.5347		247.773
48.804		189.115
55.9551		305.262
64.2146		187.725
65.4785		176.755
69.9761		64.2799
100.264		147.428
69.4378		95.9982
44.6098		57.061
46.6899		135.286
40.6352		85.6768
73.6451		250.484
45.3712		164.773
40.7535		219.608
42.1614		166.754
30.3663		122.532
38.5862		92.3114
35.6518		189.664
38.4068		118.53
30.6482		151.049
53.1712		177.449
30.07		95.2067
31.8732		112.857
39.5492		58.3592
55.8296		206.064
38.0074		110.171
39.4803		154.877
36.5984		244.126
67.0349		121.662
48.4412		54.7961
117.382		85.0407
96.1629		178.738
70.7777		321.685
44.6591		71.4778
74.1275		82.0367
49.0722		118.798
41.1129		77.1536
70.5363		100.735
47.3218		61.5379
36.8576		134.381
56.918		71.5493
36.3012		63.4837
36.2075		44.6583
42.626		124.694
50		157.913
46.1267		83.5527
30.4094		62.1784
31.2144		159.112
40.7407		167.079
34.5458		50.6691
66.2054		40.499
63.0088		57.4706
61.552		52.1529
78.1201		40.6953
62.641		147.839
95.6809		70.4738
95.5494		36.3032
60.6323		52.4506
70.0626		69.0196
30.3724		95.721
90.1767		68.1747
86.0894		46.0493
131.2		54.8236
61.1713		126.073
77.3589		42.2731
71.2117		53.5777
37.2605		62.2743
65.9447		34.3263
85.4668		49.9752
47.6632		51.1544
62.6483		93.7688
51.4198		83.6204
40.3794		55.7152
64.3293		39.2792
72.4868		67.1914
63.2259		163.035
60.1508		61.1059
47.8717		66.8641
83.0997		47.2895
67.4061		45.1303
51.5356		40.4722
60.7913		49.9628
72.5339		70.584
71.6865		174.41
76.8959		191.148
60.5288		63.9713
71.3299		73.4107
48.3033		48.4718
92.1778		44.2657
80.3011		41.8703
41.4475		78.4173
59.389		37.6407
53.1142		96.677
77.5086		37.0993
79.589		51.1804
55.5331		141.132
82.9308		44.5105
122.325		45.6401
61.7004		43.205
34.2153		104.024
114.65		72.0114
101.183		57.446
50.1657		93.7642
73.4022		48.7319
80.9261		32.9917
56.5055		36.9605
58.1326		56.6524
67.7174		58.2072
83.2673		139.288
41.9309		58.7157
69.5864		66.7272
78.9828		44.8459
72.0874		51.8216
48.1482		59.0662
63.3333		60.7957
92.2678		73.7397
74.6421		76.3988
55.5121		48.7105
56.6003		111.732
57.3984		70.5774
45.1587		60.497
31.3029		90.7352
80.4933		152.252
49.4186		129.543
31.07		41.1928
37.4667		30.5194
49.0294		46.1764
56.5115		131.345
50.1835		90.2837
32.7213		70.8472
46.6326		64.3578
47.0497		110.957
62.1381		92.1956
56.3247		38.0145
79.344		41.0907
52.5412		69.5763
40.8865		108.681
40.1737		46.0444
31.4347		37.8572
30.7463		47.9047
62.6245		43.7667
58.0856		51.451
39.1061		98.8811
37.5365		82.0812
55.457		82.4365
38.6172		79.1548
41.596		121.405
46.3415		69.7146
37.2364		207.024
33.0869		41.9876
38.2693		62.111
63.2169		66.8716
64.2058		66.3294
55.3561		41.3344
43.6381		104.654
62.6335		67.7565
64.2933		42.3521
44.3802		71.1359
47.1236		40.4468
55.645		103.723
46.6124		36.7228
33.46		35.7607
67.5511		53.218
63.8495		38.1818
61.3492		46.5182
73.1584		88.3519
66.4474		67.8168
54.4056		93.001
75.8397		78.3103
57.3438		81.8182
68.3172		59.9379
73.5243		42.3646
80.0271		33.1708
60.807		62.0626
57.6642		66.2087
41.0636		38.377
62.4939		40.2553
47.6703		96.0394
69.9541		156.847
40.4541		68.2913
60.8338		50.1721
39.5428		110.017
43.1502		150.774
77.9906		40.7118
57.5947		88.9353
69.6106		59.5262
58.6292		92.2844
70.1271		137.687
86.8952		70.1966
64.7641		112.131
54.0813		64.7835
65.2379		81.5768
79.1187		63.6484
35.6342		49.818
60.1059		32.2022
57.6174		44.9383
67.802		72.9994
38.3356		47.8565
42.452		101.684
56.909		36.0969
57.4372		34.9943
50.1388		57.0575
41.5318		146.038
70.7016		143.381
60.289		79.958
45.003		80.8025
75.1107		49.248
47.8048		70.2014
69.0309		32.8119
38.3732		65.2939
56.1613		62.1976
54.939		62.0395
64.4686		98.5133
53.2475		100.05
60.7891		76.1133
34.521		87.5732
68.851		162.07
59.2621		51.8077
51.0405		65.1785
62.3913		54.2879
39.7607		146.217
50.4773		65.007
56.6852		104.417
59.268		35.048
83.2599		55.6622
65.8179		113.088
32.6843		65.8546
78.15		83.2383
61.668		95.2991
74.9954		48.6086
69.9022		50.7064
72.2009		76.2575
58.2274		50.7942
57.1504		44.5815
84.5134		61.9344
101.129		51.8317
80.7455		171.041
78.3321		169.203
76.3571		62.8571
66.4313		58.5447
63.6291		54.5473
64.7704		71.8707
65.5455		92.2501
50.6003		76.4438
55.8705		37.9468
56.9733		56.1828
67.2242		31.659
52.1674		34.1949
43.6684		35.5204
42.0712		59.5392
72.8335		166.144
39.3631		77.7287
42.2302		57.4713
40.6957		47.3449
38.2222		48.3672
58.5445		49.5658
68.2645		45.0404
47.1762		58.1447
49.523		38.6527
58.0832		49.8541
54.6099		63.6405
66.6667		34.8894
53.7447		41.1587
61.665		62.1904
57.1781		32.7679
54.642		36.2029
85.4473		40.4088
55.4779		46.4121
55.8419		34.559
56.2941		34.9386
50.2794		44.4103
73.213		141.249
50.7246		59.4096
47.2606		34.11
55.0988		30.1348
42.6697		63.7695
39.5565		30.1844
62.2222		34.0614
44.8069		30.4799
59.1814		35.8113
40.7146		42.5743
45.475		33.3333
52.1281		38.3814
43.8921		51.1251
55.0139
57.5031
65.7393
50.3695
41.1114
51.2248
59.6168
57.3445
37.1404
34.9764
42.5437
30.0465
39.0774
32.4552
53.1293
47.6612
49.5183
55.7451
50.3513
32.7671
40.156
38.0569
45.5786
43.7176
38.4397
42.7662
43.494
38.4732
31.7039
43.8344
40.443
44.1118
46.7668
55.021
32.6221
43.5897
50.7284
80.1754
48.8845
49.8748
53.3296
42.9349
71.5541
51.0185
93.8303
46.9738
65.421
41.7802
69.7462
31.5203
54.5684
48.7805
55.2012
75.8597
72.4015
47.1182
55.7066
55.0856
64.3106
48.7478
67.1733
39.0949
73.9727
62.0198
56.3748
63.5144
82.8962
64.8985
52.3697
62.776
73.0789
57.435
54.0478
67.826
84.0631
57.8218
58.8996
67.1356
85.8657
89.8294
81.8565
70.4298
79.1338
56.9497
37.241
69.1294
86.2205
59.685
62.1544
103.814
83.5831
61.9483
55.3841
106.79
39.3195
53.2136
48.3359
49.2975
55.3339
65.3031
55.8855
49.0094
63.4478
74.4813
58.2997
45.7912
49.9664
61.9739
50.8424
80.1383
34.9903
49.6191
55.2159
47.3708
63.7543
80.1754
48.8845
49.8748
53.3296
42.9349
71.5541
51.0185
93.8303
46.9738
65.421
41.7802
69.7462
31.5203
54.5684
48.7805
55.2012
75.8597
72.4015
47.1182
55.7066
55.0856
64.3106
48.7478
67.1733
39.0949
73.9727
62.0198
56.3748
63.5144
82.8962
64.8985
52.3697
62.776
73.0789
57.435
54.0478
67.826
84.0631
57.8218
58.8996
67.1356
85.8657
89.8294
81.8565
70.4298
79.1338
56.9497
37.241
69.1294
86.2205
59.685
62.1544
103.814
83.5831
61.9483
55.3841
106.79
39.3195
53.2136
48.3359
49.2975
55.3339
65.3031
55.8855
49.0094
63.4478
74.4813
58.2997
45.7912
49.9664
61.9739
50.8424
80.1383
34.9903
49.6191
55.2159
47.3708
63.7543
100.52
110.796
67.3728
108.263
85.7187
60.9049
92.4349
76.1395
65.1373
71.9916
73.2524
78.0897
87.8936
106.554
70.0256
81.0818
60.3901
43.4723
90.8092
111.924
78.9226
79.4053
100.61
58.4385
52.0231
91.384
63.4
71.3895
54.6459
75.5488
65.0092
81.2223
73.6259
83.9646
88.2496
53.2886
62.6016
59.1057
71.1572
44.7536
89.316
55.6229
53.4916
85.0926
64.8559
69.8682
65.6061
50.7188
32.7576
74.1451
63.3718
54.8801
67.6191
35.6832
45.2043
66.1096
49.3525
45.6354
51.4378
63.5181
60.5205
90.2479
64.0549
61.5635
92.9773
60.8503
115.203
75.0972
57.2749
78.4812
86.69
70.21
57.7313
79.8561
83.958
73.1177
61.4548
65.5841
55.7689
45.0935
51.2757
57.0448
40.8445
64.6312
37.807
51.0173
55.4927
49.4795
102.566
44.2964
44.0418
50.6676
66.4612
56.3218
63.2363
64.4154
57.8424
93.6489
96.606
93.908
67.7925
65.7155
45.5376
67.0548
58.7635
59.3296
62.2934
100.048
46.2596
42.3767
44.473
49.1565
42.9792
44.5028
42.9313
32.2705
31.482
40.5151
47.0733
51.9884
69.1533
31.1234
72.4796
34.8837
49.1555
38.6473
40.2172
60.4226
57.916
50.5487
39.5911
44.7765
39.8018
41.7954
55.8122
67.8646
48.8394
68.6845
64.0961
45.5766
76.3153
45.01
45.2416
36.6041
57.7626
39.2282
53.5462
52.0204
42.8704
43.8586
59.3861
61.2969
52.6238
54.0673
43.4107
50.6376
53.7016
69.1119
57.544
61.4053
55.4089
41.9558
45.2613
43.0263
59.9658
67.9857
37.1515
69.697
63.5331
56.6686
72.0241
80.8436
59.3856
54.8914
51.615
93.0134
97.9834
60.3709
77.8219
70.7708
52.2391
58.5069
56.5502
42.7595
63.0241
48.9102
32.9317
47.1616
33.8207
43.8181
62.2744
58.7037
49.9121
56.926
53.4295
67.9198
61.0878
54.2032
41.1445
62.5175
51.2108
45.2528
67.0249
33.9559
36.253
46.6028
47.4896
52.0803
58.4075
62.4923
61.4826
104.596
48.9971
61.9872
38.6272
42.2184
67.2285
53.3466
55.3544
62.6326
43.6652
53.6142
56.2664
58.3546
61.958
59.9511
53.0452
37.2981
63.693
80.847
117.697
78.6471
57.8415
83.3529
113.709
72.4551
72.7332
48.1738
76.1212
54.8663
95.3388
78.024
60.3424
86.5435
72.4329
99.603
75.3376
71.3042
66.5911
69.3544
66.9157
62.6055
143.374
76.6312
44.5277
142.922
113.86
88.7208
102.098
95.2273
95.7025
118.199
65.6566
104.276
152.223
92.6424
64.1096
43.078
80.6557
51.0709
67.33
93.9105
74.9441
47.1452
88.7018
107.269
113.258
72.8791
84.6217
98.2154
77.6667
107.439
64.8977
139.064
88.8889
101.334
140.79
117.092
67.6929
56.4565
62.4809
49.0033
42.9994
71.5047
59.4983
31.2471
30.9036
41.108
81.4391
108.509
66.8838
44.9652
31.723
42.9635
65.8944
44.1168
61.2383
44.6437
45.1442
34.2757
37.5325
31.8983
36.4727
28.0495
37.5807
80.345
84.3028
87.3101
58.3459
51.3442
33.4266
33.7474
42.3452
49.2967
35.7531
38.0305
36.5774
39.9661
48.7533
39.3803
30.3786
51.2516
46.6106
40.9503
33.9521
31.7304
47.3891
46.3914
43.9551
31.3514
53.5786
37.6844
34.1784
42.2893
45.0178
32.4601
34.9846
36.5407
43.6342
41.8474
32.901
51.865
36.6997
50.8058
60.9969
99.2537
76.1642
138.924
61.9023
94.7893
44.8985
108.911
138.515
107.416
139.564
121.648
142.031
107.078
67.5012
58.2169
128.355
90.6418
122.287
66.3933
148.066
82.6433
110.607
110.275
60.9412
83.5936
123.128
94.3635
65.0012
63.4797
90.9465
127.497
115.469
87.2006
123.61
81.4197
59.6965
83.4609
59.4082
73.7316
72.5062
77.705
67.3399
87.9028
87.0351
88.6271
85.4427
59.388
80.3015
88.0936
61.8531
70.8913
79.2278
66.1179
61.4772
66.1739
70.1348
55.9305
36.8865
54.1657
105.068
77.1802
91.9851
108.999
125.77
90.5657
142.572
133.359
90.5239
144.259
138.307
72.6064
81.9371
93.1574
36.6185
72.59
49.9104
50.7996
76.6256
54.3616
54.6579
41.1441
41.763
100.112
44.088
37.0283
62.9371
44.3744
36.4854
40.8152
42.5918
40.5423
51.9547
70.9172
57.1816
46.5405
68.7399
58.3115
55.3216
65.4507
47.9913
53.0616
40.9655
41.339
30.0041
40.6944
43.2984
62.5576
51.0248
65.1259
60.8757
86.3745
47.2839
80.9744
59.1944
52.5405
40.1914
67.8058
51.6084
59.5419
35.6891
40.412
33.5214
49.6949
53.9438
41.2229
61.745
50.4937
40.9751
45.8787
45.4764
83.2383
37.9218
54.5504
54.335
55.7632
51.2283
33.7384
48.4644
68.3525
41.5535
30.2006
53.6054
46.7963
54.5697
80.4062
38.2512
56.8211
59.3358
77.4512
39.6553
45.6402
42.2511
50.6251
46.1288
41.6667
49.3275
45.9785
41.3831
42.5926
65.3922
34.8367
56.418
55.0505
42.4548
45.3226
39.0572
52.2929
59.9699
48.079
44.517
34.4939
44.7642
49.5987
62.6094
42.6645
37.802
89.9475
55.9796
50.7011
56.8889
52.755
59.4406
68.421
42.3476
44.394
51.6414
43.8439
38.589
38.3399
46.619

## Sheet: Fig 1D
mouse	squirrel	human	rat
19.9414	23.3409	18.6536	17.5721
21.6549	22.779	17.299	19.9414
21.9923	19.3306	17.299	19.8513
22.0708	18.6536	18.3533	18.6536
20.8124	19.8513	18.1606	20.1807
22.4953	17.5721	18.5479	18.1585
22.0708	19.739	17.2418	22.1075
21.9923	17.6617	17.5015	19.0134
18.1606	22.9211	17.5015	19.739
21.4878	22.9211	19.2166	20.1807
21.8704	18.6536	17.671	19.5233
22.0708	20.1807	18.1585	18.3533
21.4878	21.2727	19.5233	17.6619
22.6152	18.1585	17.5721	18.1606
21.8704	19.8513	18.3533	21.2727
21.4878	18.5479	17.2926	17.4766
21.4878	17.4766	17.299	18.6536
21.5183	17.5015	17.299	18.6536
21.1824	18.1585	18.3533	18.6536
21.9923	17.6932	18.1606	19.739
21.9923	20.3648	18.3533	18.6536
20.8124	19.0134	18.1585	17.5015
20.6949	18.7596	17.6617	19.5233
18.6536	18.3533	18.1585	20.6949
21.4878	20.3648	17.6617	17.6619
17.5015	18.1606	18.1585	17.2418
21.9923	20.4285	18.3533	18.1585
22.0708	18.1585	19.739	19.5233
21.2727	20.3648	18.1606	17.6989
21.4878	17.6932		21.0057
22.0232	18.6536	17.4766	17.6932
22.4953	23.6903	22.4953	17.2926
21.5183	20.3648		18.1585
22.0809	17.5721	19.5233	17.2418
21.8704	19.9414		20.3648
22.1247	23.6903		17.2418
18.7596	21.2727	18.7596	17.299
21.4878	20.6949	17.5073	21.0057
	19.9414	17.5721	19.0134
	19.8513	22.5421	17.6619
	17.5721	19.0134	17.6932
	18.1606	18.5479	18.3533
	17.2418	20.3648	17.5073
			19.2166
	19.8513		21.4878
	19.5233	17.9841	19.9414
	19.2166		17.6617
	18.5479	18.6536	17.6932
21.0057	17.5073	19.5233	19.9414
18.5479	19.8513	17.2418	23.1088
18.3533		17.299	18.6536
		19.3306	19.5233
17.2418		17.6617	17.299
17.2926	20.1807	17.6989	20.1807
17.2926	17.4766	17.6619	18.5479
	17.4766	17.6932	17.5015
20.6949	17.5721	18.1585	21.8704
19.8513	18.1606	18.6536	18.5479
20.6949	17.6619	17.299	19.9414
19.5233	17.5015	17.671	22.8433
20.8124	17.671	17.2926	18.5479
20.6949	17.5073	17.2926	18.1606
19.5233	17.6989	18.1606	19.5233
18.1585	18.6536	19.3306	18.3533
20.6949		17.6619	19.739
21.4878	17.6989		17.671
20.6949	17.671	17.299	17.4766
21.0057	17.2926	18.1606	19.3306
20.6949	17.2926	19.3306	17.6619
21.5183	17.2926		17.299
21.9923		17.4766	17.5073
20.6949		17.4766	21.0057
21.8704	17.4766	17.5073	19.739
21.2727	17.4766	20.3648	17.4766
20.6949	17.2926	21.0057	17.9841
21.8704	18.1585	17.6617	18.1606
21.1824	17.5015		19.5233
20.1807	18.6536
19.5233	18.1606		18.3533
19.3306	18.1606	17.671	17.5721
20.6949	17.6932	18.6536	17.6619
	17.6932	17.671	17.2926
21.5183	17.6932		17.6617
21.6549	18.1606	18.5479	18.6536
21.6549	19.5233	19.2166	21.4878
19.9414	17.5073	17.2926	18.5479
21.8704	18.5479	17.6619	18.1585
21.1824	19.8513	17.6619	19.5233
21.8704	17.4766	19.9414	20.1807
	17.299		18.5479
21.6549	17.6932	17.6619	17.5073
21.1824	18.7596	17.4766	18.7596
19.8513	18.1606	21.0057	17.9841
21.5183	18.1585	22.6356	17.5721
21.5183			17.9841
20.4285		22.6356	17.9841
21.4878		22.2273	20.6949
	23.3409	19.8513	18.7596
18.1606	23.1088	19.0134	18.5479
21.2727	17.5721	23.501	19.3306
22.0232	20.3648	22.1075	17.5721
17.5721	19.2166	17.671	17.2926
	23.3409		17.6932
17.5015	17.299	17.6619	17.5721
21.1824	19.8513
20.8124	19.739		17.2926
21.6549	17.6617	17.6932	17.2926
21.6549	18.3533		17.2926
17.2418	20.3648
22.3137	19.9414		18.3533
22.0708	20.3648		20.1807
19.9414	19.8513		17.5073
21.8704	19.0134		17.2926
20.1807	17.2926		17.2926
20.3648	19.3306		19.9414
22.3137	19.9414		17.2926
22.0708	18.5479		20.4285
21.9923	18.7596		17.6932
21.2727	19.5233		21.2727
18.1606	17.6932		17.2926
19.8513	17.6932	17.4766	17.6619
22.0708	20.3648		17.2926
17.2418	19.739		17.2926
20.3648	19.2166	17.5721	18.5479
19.3306	19.3306
21.6549	19.5233
21.4878	19.8513	22.6356	19.5233
20.1807	17.299
21.2727	19.739		19.739
	17.5721	17.6619	17.6989
22.0232	19.739	17.2418	19.2166
19.0134	19.8513	17.4766	18.5479
17.671	19.8513	17.671	19.2166
22.0708	19.739	17.6617	17.299
22.1231	17.6932	19.9414	19.2166
22.0809	18.7596	19.0134	17.6619
17.5073	18.5479	19.9414	17.671
21.8704	19.739	17.6619	18.6536
21.6549	18.1585	18.3533	17.6619
	18.3533	17.9841	17.6989
	20.3648	19.0134	17.6617
21.8704	19.8513		17.5721
21.5183	20.3648	18.6536	18.6536
22.1231	18.5479	17.2418	19.9414
22.1231	17.5721		20.8124
20.8124	20.1807	17.5721	23.6903
22.0809	19.8513	17.671	19.0134
	18.7596		19.2166
22.1231	22.1247	17.6619	18.1585
22.0708	17.5721	19.0134	18.6536
22.3137	20.1807	19.3306	19.3306
22.1075	19.739	17.2418	17.5073
22.1231	19.8513	17.2926	21.9923
19.2166	18.6536	17.299	17.5721
	19.0134	18.1585	17.671
21.9923	19.5233	19.3306	17.9841
17.4766	19.3306	17.671	18.1606
21.5183	18.5479	18.5479	17.5073
21.5183	18.1585	17.6932	17.5073
21.0057	17.5073	19.2166	19.3306
18.5479	18.6536	19.739	18.7596
18.7596	17.6989	20.1807	18.1585
21.5183		17.4766	17.6932
	18.5479	17.671	20.3648
20.3648		17.2418	17.671
17.2926	19.739	19.8513	18.5479
	18.3533	17.2418	17.6932
20.6949		20.1807	17.6989
21.8704	19.8513		17.9841
19.739	17.6617	18.7596	17.6932
18.5479	18.6536		19.8513
19.5233	17.2926	17.671	17.4766
21.4878	21.6549	17.671	17.5015
19.3306	17.671	17.6932	18.5479
18.6536	17.9841	19.739	17.671
	17.2926		18.7596
18.1585	17.2418	18.7596	17.6619
	17.6619	17.5015	17.6617
17.5721		17.671	17.5073
17.6619			17.6932
21.0057	17.2926	17.299	18.1585
21.0057	18.5479		18.7596
19.8513	18.1585	17.671	18.3533
20.1807	19.5233		17.2418
21.2727	17.5721	17.671	17.5015
20.6949	19.2166	17.5015	18.1585
20.3648	18.6536		18.6536
19.739	18.1585	21.5183	17.6932
18.6536	18.3533	21.4878	17.2926
19.9414	17.5721	20.8124
20.4285	18.7596	18.5479	17.6617
17.4766	18.1606	17.671	19.2166
21.5183		19.2166	19.0134
17.5015	17.9841	17.299	19.3306
21.5183	17.4766	17.671	18.5479
17.299	18.5479	20.4285	18.3533
20.1807	19.5233	20.1807	17.6619
17.6617	19.2166		18.7596
18.1606	18.7596	18.3533	17.6619
20.6949	19.2166		17.6619
19.2166	18.1585	19.2166	17.4766
17.6932	18.7596	19.5233	17.9841
	19.2166	17.299	17.6989
17.6989	17.5721	17.6989	17.6617
21.4878	18.3533	17.6617	17.5015
21.6549	17.6932	22.9211	17.6619
17.5015	17.6932	20.8124	17.2926
17.671	19.739		17.5073
22.0708	17.6932	19.2166	17.671
18.1585			17.671
22.0809	18.3533		17.6619
17.2418	17.6989	17.6989	17.2418
21.0057	17.6989	17.6932	18.1606
18.1585	18.7596		17.4766
	17.5721	17.5721	17.4766
19.739	17.5073		17.4766
18.1585	17.9841		17.9841
21.0057	17.5721	21.1824	17.9841
17.6617	17.4766	19.8513	17.6619
18.1585	18.6536	17.2926	18.1606
17.671	17.9841		18.1606
22.0809	17.5015	17.6989	17.671
22.3137	17.6619	17.5073	18.5479
	20.6949		18.6536
21.9923	21.9923	18.6536	17.6932
21.4878	18.1585	19.0134	17.5015
20.4285	19.5233		17.5015
19.739	17.6932	19.9414	17.9841
20.8124	18.7596	17.5073
22.0232	23.501
20.6949	18.7596	19.5233	17.6619
21.4878	23.501	19.8513	17.5015
22.0232	20.3648	18.1606	17.6619
21.0057	21.8704		17.2418
21.8704	23.6903		18.6536
	17.9841		18.7596
21.1824	18.5479		17.6619
17.2926	17.9841	17.6989
22.0708	17.2418		20.4285
		17.299	18.3533
20.6949	18.7596		17.9841
22.0708	21.9923		18.3533
21.4878	23.5298		17.9841
	19.0134		17.5015
17.4766	19.8513		22.9211
	22.1075		17.6619
21.9923	20.3648		17.5721
17.299	20.6949	17.9841	17.9841
17.299	17.671	17.299	17.6619
20.3648	18.5479	22.0809	18.6536
17.2418	17.2926	22.1075	17.671
17.2418	18.7596	19.2166	17.5015
	19.3306	17.5073	20.1807
17.6619	19.739	19.5233	18.1585
17.6989	20.3648		17.2926
	20.4285
17.5073	19.2166	17.4766	17.6619
21.4878	19.739	19.739	17.5721
21.2727	19.0134		17.9841
17.5721	19.2166	17.299	18.3533
18.3533	18.5479		17.5015
22.2273	18.6536	19.5233	17.4766
19.3306	18.3533	18.7596	18.3533
	20.6949	20.4285	17.9841
	19.739		17.9841
21.5183	18.7596	17.6989	18.6536
22.0232	20.3648	18.6536	17.299
22.0232	18.5479	20.4285	17.5073
22.0708	18.7596	19.3306	17.2926
18.3533	17.2926	19.2166	17.299
17.5073	18.3533		18.1606
18.5479	18.1585		18.6536
21.6549	18.1606	17.6932	17.5073
22.0809	18.1585		17.9841
22.1075	18.6536	18.1606	18.6536
22.1231	18.6536	19.5233	17.5015
22.1231	18.1585
21.4878	18.1585		18.3533
21.6549	18.7596	17.671	17.5015
22.0708	18.5479	19.9414	18.6536
21.8704	17.2418	17.5721	17.5721
21.8704	19.0134	17.2418	17.6617
22.0708	18.7596	17.671	17.9841
22.0708	19.0134	17.6989	18.1585
21.4878	18.3533	18.6536	17.299
22.0232	17.9841	17.2418	17.299
22.1231	17.5721		19.3306
21.4878	18.1585	19.2166	19.3306
20.6949	18.6536	17.6617	17.6932
21.2727	18.1606	20.6949	17.2926
18.1606	17.6932	20.1807	17.299
22.0708	17.9841	19.8513	18.3533
21.6549	18.3533	17.6619	18.6536
22.0232	18.1606	19.9414	17.5015
21.2727	19.3306	19.0134	18.6536
21.5183	18.5479		20.4285
17.2418	18.7596	22.1247	17.5073
21.1824	18.7596	18.3533	18.7596
22.0232	19.2166	17.299	18.3533
22.0708	17.9841	18.1606	17.9841
17.6619	19.0134	19.0134	17.6617
22.0809	18.3533	19.3306	18.6536
21.4878	18.3533	17.2926	17.6619
22.0708	17.9841		17.299
19.739	17.6619		17.6619
21.5183	19.3306	22.3137	17.2926
19.739	18.1585		17.2418
21.8704	17.299	17.4766	17.299
21.4878	18.6536	17.2926	22.0232
21.6549	17.671	17.671	17.299
22.1231	18.3533	17.6989	17.6989
22.2273	18.3533	20.3648	18.1606
21.9923	19.0134	18.7596	17.6619
22.0809	17.671		19.9414
17.6619	18.3533	17.299	17.6989
20.6949	18.5479	19.0134	17.299
20.4285	18.6536	22.0809	20.6949
21.9923	17.9841		17.6617
21.9923	18.3533	17.299	17.4766
21.6549			17.5721
21.0057	18.6536
19.739	17.5721	17.671	18.6536
	17.6932	17.299	17.6617
17.5015	19.2166
17.6619	20.4285		17.2418
	20.3648	17.2926	17.9841
18.1606	20.6949	21.1824	17.6989
20.8124	21.0057	18.5479	17.4766
20.4285	18.7596	22.9211	17.4766
21.8704	19.2166		17.4766
22.0809	19.3306	17.2926	17.4766
21.9923	20.1807	19.8513	18.1606
21.8704	19.9414	17.4766	17.4766
22.1247	19.9414	17.299	17.299
22.4765	19.9414	18.7596	17.6619
23.6903	19.739	17.6989	17.6989
22.2273	19.2166
17.4766	19.739	18.3533	18.1606
21.2727	18.1585	17.671	17.299
21.5183	17.9841		17.6617
22.1231	19.0134		19.8513
21.4878	20.3648		17.6619
19.5233	18.3533	17.4766	17.5721
21.6549	19.0134		22.0232
21.0057	19.0134		18.1606
21.2727	18.1585		17.299
20.8124	19.0134
19.8513	19.0134	21.1824
20.6949	19.3306	17.299
21.0057	17.9841	20.3648	17.6932
21.1824	17.6617	22.2273	17.299
22.0708	19.8513	17.6619
20.3648	19.739	17.299
22.0232	19.3306		17.2418
21.5183	19.3306		17.6617
20.3648	22.0232	23.3409
21.1824	20.1807
21.5183	19.5233	17.4766	18.6536
17.6989	20.6949		19.5233
21.6549	22.0232		19.5233
20.6949	20.1807	19.0134
19.5233	19.3306
22.0809	20.1807
22.1231	17.6619		17.2418
19.9414	20.1807		17.5721
17.299	22.0232	17.6989
21.8704	19.8513	18.5479
22.0809	18.1585		17.299
20.1807	18.1606		18.6536
21.8704	19.0134	17.2418	17.2418
21.5183	17.5073		17.6619
21.2727	18.3533
21.5183	20.1807		17.5721
21.0057	19.0134
19.9414		17.2926
20.4285	18.1585	17.2926	18.1606
22.1075	19.3306
21.2727	19.0134		18.6536
20.6949	20.1807		17.6619
20.4285	20.1807
20.8124	17.5015		17.6617
22.0809	17.6619		19.739
21.4878	20.4285		17.5721
21.9923	20.4285		17.6619
22.1075	20.1807		17.5721
22.0809	19.9414		17.6619
21.4878	20.3648		17.5721
22.0708	20.1807		17.4766
22.0232	17.6989		17.6989
21.9923	17.4766		17.299
21.5183	17.9841		17.2418
20.8124	17.671
21.4878	19.0134
22.0232	19.5233	17.299
22.0708	17.9841
22.0232	20.4285	17.6932
21.5183	18.6536
21.9923	19.0134
20.6949	17.9841	22.779
21.8704	17.671	17.2926
21.5183	18.3533	17.2418
21.8704	19.8513
17.4766	20.4285
21.9923	20.4285	17.299
22.0232	20.1807
17.4766	18.5479
21.8704	17.2926	17.5073
20.8124	20.8124
20.6949	17.9841
21.8704	21.0057	17.299
22.0232	21.6549	17.2926
17.4766	22.1231
21.5183	20.8124	19.5233
21.9923	20.6949	17.2926
22.0809	20.8124
22.2273	18.3533	17.6619
21.4878	22.4953	17.6619
22.1247	19.2166	17.2418
21.5183	19.9414	17.2926
21.2727	19.0134	19.3306
21.6549	20.8124	17.6932
19.5233	18.5479
22.4765	17.6619	19.5233
22.2273	17.299	17.6989
22.0809	17.6619	19.0134
22.8433	18.5479	19.2166
22.6152	17.6617	18.1585
22.6356	17.6617	17.2926
22.6356	17.6617	17.6989
22.9211	19.2166
22.3137	18.1606	18.1606
20.8124	19.739	18.6536
22.6356	20.6949	17.6989
22.8433		17.5015
22.6356	17.2926	17.5015
22.5421	22.6356	17.6989
18.5479	22.3137	17.6617
22.6022	20.6949	19.739
22.6356	18.7596	19.0134
22.2273	22.6152
21.1824	22.3137	17.4766
20.6949	22.9578	20.6949
17.5073	22.8433	17.6619
21.9923	20.3648
22.4765	20.1807	18.3533
22.5421	22.0232	17.6619
22.6022	19.8513
22.6022	20.1807	17.671
22.8433	20.1807	19.3306
22.6152	20.1807	19.739
22.6356	20.1807	17.9841
22.0232	19.3306	19.2166
22.6356	22.1231	17.5073
22.5421	19.739	17.5721
22.4953	17.6617	19.0134
22.4953	22.8433	17.6617
22.6356	19.3306	19.2166
22.2273	20.1807
22.1247	19.9414	19.739
22.4953	20.3648
22.6356	18.7596	18.6536
22.4765	22.1231
22.5421	22.1231
22.4765	20.6949	17.671
22.1075	20.6949
22.2273	19.9414
22.6356	19.739
22.4953	17.299
22.4953	19.739
21.1824	19.9414	17.2926
21.9923	20.6949
20.6949	20.6949	17.2926
22.3137	19.9414	17.6619
22.5421	20.6949	17.5015
22.2273	20.4285	17.5073
22.0708	19.9414	17.5721
20.3648	20.4285	18.3533
21.9923	19.5233	17.6619
22.1231	17.5015	21.0057
22.4765	19.739
22.4953	20.4285
22.5421	20.3648
22.4953	17.6932	17.299
22.6356	18.7596	17.6932
22.4765	20.3648	19.2166
22.4765	19.0134
22.6356	20.4285	17.6619
22.5421	19.9414	21.8704
22.6022	19.8513
22.5421	17.6932	17.6619
22.5421	19.8513	17.5721
22.6022	20.6949	17.6617
22.4953	19.0134	17.5073
22.4953	19.739	18.1585
21.9923	17.5015	18.1606
21.4878	17.6619	17.5721
19.8513	18.5479	17.6619
20.3648	19.5233	17.299
21.9923	19.0134	17.5721
21.9923	20.3648	21.0057
22.4765	22.4765
22.5421	17.4766
19.5233	20.4285	17.6619
22.6356	20.6949
22.3137	18.7596	17.2926
22.5421	17.6932
22.1247	17.5073
22.1247	17.5015
22.0232	20.6949
22.6356	20.3648	17.5015
22.1075	19.739	18.5479
17.2926	19.8513	21.0057
19.739	20.1807
18.5479	19.3306	18.5479
21.4878	19.5233	18.7596
22.0809	19.0134	20.4285
17.6932	19.2166
17.9841	18.1585
21.1824	18.5479
18.6536	18.7596	20.1807
22.1231	20.1807	18.1585
18.1585	18.1585	17.2418
21.1824	18.1585
17.4766	17.299
19.0134	22.0232
22.3137	18.1585
17.5721	19.2166
17.2418	18.1585	17.6989
18.1606	19.9414
22.3137	18.7596	18.6536
19.2166	18.7596	17.6989
22.1247	18.3533
22.1247	18.1585	18.7596
19.8513	19.9414
18.1606	20.4285	17.6932
19.0134	22.4953	17.6989
22.0708	19.739	17.6619
22.1231	18.1585
22.6022	18.1585
22.779	18.5479
21.6549	19.5233
20.4285	17.4766
19.8513	19.9414
17.2418	19.8513
17.5073	18.1585	19.0134
17.5721	18.3533
17.6989	20.1807
21.1824	18.3533	18.1585
21.0057	22.9211
17.299	19.3306
17.6989	19.5233
17.6989	18.3533
17.671	17.2418
22.1247	20.4285
19.8513	18.6536	18.7596
21.0057	19.9414
21.9923	19.2166
17.299	18.1585	17.5721
19.5233	20.4285
18.1585	20.1807
20.4285	20.1807
22.1075	20.4285	17.299
20.6949	18.1585
20.1807	19.3306
21.9923	18.3533
17.299	20.3648
20.6949	17.2926
19.5233	20.6949
19.9414	20.1807
21.9923	17.2926	17.6619
19.8513		17.9841
17.299	18.3533	22.4765
18.1606	20.1807	21.4878
21.9923	20.8124	21.1824
19.3306	19.9414	19.3306
	20.4285	19.0134
19.0134	19.2166	19.5233
	18.6536	19.8513
22.3137	17.6989
22.4953	20.1807
20.6949	21.0057
18.3533	20.8124
22.0708	21.2727
21.9923	20.6949	18.1585
21.9923	17.299
18.3533	21.0057
18.3533	20.3648	17.6619
18.6536	20.1807	19.5233
22.0809	20.3648	17.671
20.8124	20.8124	21.0057
17.6932	17.5721
22.4765	18.5479
17.4766	19.5233
	17.2926	17.6932
17.5015	20.4285	19.0134
17.299	20.3648
18.3533	20.4285
21.8704	17.299
20.3648	17.5721	17.5015
22.0809	19.739
	20.4285
21.0057	17.6619	22.0232
21.5183	20.3648	19.3306
22.6022	19.739	21.4878
22.8433	17.6989	21.2727
23.6903	19.5233	17.6617
21.9923	18.5479	22.6356
17.6932	19.3306	20.1807
21.5183	19.739	22.0708
17.299	17.6989	18.7596
22.0708	17.2926	19.2166
17.2926	17.2926	20.6949
20.3648	17.2418	22.5421
19.5233	17.2926	20.6949
	17.299	21.8704
	18.1606	18.7596
17.5015	20.3648	19.9414
	19.9414	19.5233
20.4285	19.3306	22.2273
17.5073	18.6536
21.9923	18.7596	18.5479
19.2166	19.8513	22.6152
20.6949	19.2166	20.3648
	19.9414	18.1606
18.5479
	18.3533	17.6989
18.1585
	17.299
	19.2166	17.299
17.6617	19.2166	19.3306
21.2727	19.5233	17.2926
17.6932	17.6619
21.6549	18.6536
17.4766	17.5721	22.1231
	18.1606
17.6989	19.3306	19.9414
20.8124	19.5233	17.6932
21.6549	17.9841	22.1247
21.6549	17.9841	17.671
	18.7596	22.779
21.8704	18.7596
	18.6536	18.1606
21.5183	17.2418	20.6949
21.9923	19.2166
17.5015	19.5233	19.739
21.1824		18.6536
20.1807	17.2418	17.6932
	21.0057	19.2166
	19.8513	19.5233
	19.739
		22.9578
17.299	17.6989
21.1824	17.6989
	17.2418	18.7596
	18.3533	21.4878
21.9923	17.6617	18.3533
17.9841	19.2166
19.3306	18.6536
17.2926	18.7596	17.6932
22.0708		17.299
17.299	18.1585
20.3648		19.2166
21.5183		17.299
19.5233	17.5015	17.6619
20.6949	18.5479	23.1088
17.2418	18.6536
21.9923	22.5421	19.3306
22.1231	19.0134	22.6152
18.1606	19.2166	23.501
17.2926	18.6536
21.1824	18.3533
21.8704	19.5233
18.1585	18.6536	21.4878
	17.2418	17.2418
19.0134	17.6619
17.9841	17.6619
21.8704	19.5233	17.5073
17.2418	19.3306	17.6617
17.6932	18.6536	22.1231
20.4285	20.1807
22.1075	18.5479
17.2418	17.2926	17.2926
21.9923	17.2418	22.1231
21.4878	17.2418	18.5479
17.5015	18.6536
17.6932	17.6619	17.5015
21.9923	18.7596	17.2926
	19.2166	17.4766
17.6932	17.5721
17.2926
22.4765	17.6617
21.1824
20.3648	17.5073	18.3533
17.2418	20.6949
20.4285	19.0134	18.7596
19.8513	19.5233
	17.6619	18.3533
18.3533	20.4285	20.6949
22.1247	19.3306	18.1585
22.0232
	17.9841	22.2273
18.3533	17.5721	17.6932
20.1807	19.0134
17.5015	17.6989
21.6549	19.2166	22.1247
21.9923	18.1606
17.5015	18.6536
17.5721	19.9414	17.2926
22.0809	19.3306
17.5721	19.3306
21.8704	19.739
22.1247	19.8513
22.0708	21.0057
21.9923	19.5233
22.0809	17.671
19.3306	17.2926
17.6932		17.5073
	18.5479	17.299
19.3306	20.3648	19.8513
20.8124	19.5233	17.2926
21.9923	19.5233
22.0809	17.671	17.2418
22.0708	20.6949
22.0232	18.5479
22.1231	18.7596
22.0809	19.3306	17.5015
21.9923	19.5233	18.3533
21.9923	19.5233
	19.3306
20.4285	19.8513
21.6549	17.2418
17.6932	19.8513	17.6619
21.4878	19.739
22.0232	20.1807	22.3137
20.4285	18.6536	22.8433
21.6549	19.2166
17.5015	19.5233
22.1247	19.8513
22.1075	17.5721
21.6549	19.9414
17.5015	20.6949
22.0232	19.5233
20.4285	20.4285
22.1231	20.8124
22.0809	19.0134
21.0057	20.3648
17.5721	18.3533	22.1231
22.0232	20.1807
22.0809	17.6932
19.3306	20.1807
	20.6949
22.0232	21.1824
19.8513	20.3648	19.9414
17.5073	20.3648
	17.9841
19.3306	20.4285
17.9841	19.5233
18.1585	19.9414
18.6536	19.9414
17.4766	18.7596
18.6536	19.9414
20.3648	20.4285	17.9841
22.3137	20.4285
	18.5479
17.6619	20.4285	17.6617
20.1807	21.0057
20.6949	19.9414	20.8124
19.5233	21.0057	17.4766
20.1807	18.3533
21.5183	19.8513	17.5015
21.9923	21.1824
22.1247	19.0134	22.4953
21.2727	20.4285	19.3306
20.6949	20.1807	17.5073
22.1075	17.6619
22.1231
22.1075		17.5073
22.0232		17.5721
22.0708		18.3533
22.0232
22.0232		17.299
19.3306		17.5073
22.0708		18.6536
22.0809		22.8433
22.1247		19.9414
22.0708		18.5479
17.6989
22.0809		17.4766
21.8704		18.1585
22.6356		20.1807
22.4953		18.7596
22.0809		17.9841
22.0708		19.9414
23.3409
22.3137		20.3648
21.1824		21.5183
22.1231
22.1075		18.3533
23.501		17.5015
21.8704		22.6356
21.9923		19.739
17.5721
17.671		17.4766
19.0134
18.1606
21.9923		17.4766
17.2926
21.6549
20.3648
21.0057
17.6989		17.5721
17.5015		17.5721
21.9923
21.8704
20.1807
19.739		19.8513
22.1247
22.0809		17.2418
22.1075
22.1231		17.5721
22.3137
22.1247
22.1231		17.6989
22.1247
22.3137		17.5073
22.2273		19.5233
21.5183		17.6619
22.1075		17.6989
22.4765		23.6903
22.1247		17.299
22.0232
21.6549		17.299
21.0057
17.2418		19.739
18.5479		18.1606
20.8124		17.9841
22.1075		18.1585
22.1075		17.4766
19.9414
17.2418		17.9841
19.9414
20.6949		17.299
17.4766		17.299
21.1824
21.0057
17.299
17.2418
20.6949		17.671
17.2418
17.2418		17.2418
20.6949		17.6932
20.6949		17.6932
17.299
20.4285
19.739
21.9923		20.1807
22.0708		17.6932
21.9923		18.1585
22.0809
22.5421		17.671
17.6989		19.5233
22.0232
21.9923
21.9923
22.0809		17.299
22.0232		17.299
22.0809		18.7596
		18.1606
21.8704		17.299
22.0708		18.1606
21.8704		17.4766
21.9923		18.6536
22.0708		17.9841
22.3137
22.0232
21.9923
22.0809
22.4765
22.0708
22.0809		21.4878
22.0232		20.1807
22.6022
22.0232
21.8704		18.7596
21.5183		17.671
22.4953
22.1231		17.5721
21.6549
21.8704		18.5479
22.0809		21.0057
22.1231		19.2166
22.3137		17.2418
17.9841		17.5073
		18.5479
21.9923
22.1075
21.9923
17.6619
17.5073
20.1807		18.1606
17.299		18.6536
17.2418		20.3648
22.3137		20.4285
22.0708		19.5233
22.2273
21.4878		17.6619
21.9923		17.5721
22.0708		18.1585
22.3137		17.9841
22.1075		19.739
22.0809
22.4953		19.739
22.1075		22.3137
22.0708		19.8513
22.2273		17.9841
22.3137		19.739
21.6549		21.0057
17.5015		18.5479
		18.5479
22.6022		17.6617
22.0708
21.8704		18.5479
		18.6536
17.5073		18.1585
22.0809		17.9841
22.0708		18.5479
22.3137		18.5479
17.4766
22.1247		19.739
21.8704		17.6619
22.0708		19.9414
20.3648
22.0708		19.8513
22.1247
22.2273		18.5479
21.9923		17.5721
21.8704		20.1807
21.2727
22.1231		20.3648
17.5073		19.3306
21.8704		18.1585
22.6356
22.0232
22.0232
22.1075
17.2926		18.3533
21.9923		17.6989
22.0809		17.299
21.4878
21.4878
21.4878		17.2418
22.4765		18.5479
21.9923		18.6536
22.1075		17.6619
21.4878		17.2418
22.1247
22.1231		17.671
17.2926		18.1606
17.6619
22.0232		18.1606
22.0809
22.0708		21.2727
22.0232
22.0809
22.1075		22.1231
22.0809		21.8704
22.1247		18.7596
21.4878		23.501
21.1824		18.3533
19.739		22.5421
20.3648
17.5073		23.3409
20.4285
18.7596
22.0232
22.0708
22.1075		21.4878
22.0232
21.0057		17.299
19.0134
18.1585
21.5183
22.1231
22.1075
21.4878
21.9923
22.2273		22.0809
23.1088		19.2166
22.2273
22.1247		18.7596
18.3533
22.0809
22.3137
22.4953
22.2273		21.1824
22.6022
17.4766		21.5183
17.4766		18.5479
18.7596
21.9923		23.5298
22.2273
22.0232		18.6536
17.4766
21.8704
21.4878
17.9841
21.9923
20.8124		19.2166
21.9923		23.6903
21.9923		19.0134
21.1824		23.3409
17.2926
18.1606		23.1088
22.0708
20.4285		19.3306
22.0809		17.5015
19.3306
17.4766		19.0134
21.1824
21.6549		17.671
22.0708
22.6022
22.0232
22.0809
17.4766		19.8513
22.1075		21.6549
21.2727
22.0708		22.1075
22.4765		17.2418
21.2727		20.4285
17.9841		19.2166
22.0708
21.0057
17.6989
21.4878
		19.2166
21.9923		19.2166
19.9414
17.5073
17.671
20.1807		17.9841
19.5233		17.4766
20.3648
22.1247		22.0809
21.9923		22.5421
22.0232		19.739
17.4766		20.1807
22.0809		17.6932
22.0809		19.2166
21.8704		18.1606
22.0708		21.0057
21.4878		19.8513
21.5183		17.299
21.4878		19.3306
21.2727		20.6949
20.1807		18.7596
22.0232		17.6932
22.3137		17.299
21.5183		18.7596
22.0809		22.6152
22.1231
21.1824		17.299
21.9923		21.4878
22.0809
21.8704		17.299
22.1231		21.4878
22.1247		17.299
21.6549		17.299
22.0809		17.4766
18.1606
22.0708
21.6549
22.0708
22.1075		17.6619
17.2418
22.0708
17.6932
17.9841		18.1585
22.1231		19.8513
22.0809		20.3648
17.299		17.299
22.0708		17.5015
22.0708
22.0708		21.4878
21.8704		17.299
21.4878
22.1231		17.299
22.1231		17.5015
20.8124		20.6949
22.1075		17.5015
22.0708
22.2273
21.4878		18.1585
22.0809		17.6932
21.6549		17.5721
22.0232
21.0057		17.6617
21.8704		17.299
22.1231
22.0809		19.3306
22.0232		18.7596
22.0708		17.6932
21.9923		18.7596
21.8704		17.6932
21.1824		17.6989
21.9923		17.6932
22.0232		19.5233
22.0232		22.9578
21.1824		19.2166
17.4766
17.6619		17.6932
22.0708		18.6536
22.0708		20.4285
18.1606		19.5233
22.0232		17.6932
20.6949
22.2273		17.6989
22.3137
22.1075		19.9414
21.6549		20.6949
22.0708		20.6949
22.1075		17.6932
18.1585		19.5233
20.8124		19.9414
20.6949		19.5233
22.2273		18.1585
22.1231		17.6932
18.7596		17.5721
22.0708		17.6932
20.4285		17.6989
21.6549		17.6619
20.8124		20.4285
22.2273		18.7596
22.1231		19.3306
19.2166
17.4766		17.5015
22.0232		18.3533
21.4878
21.9923
21.5183
22.2273		20.4285
21.5183		17.6932
21.2727		20.1807
21.2727		20.1807
19.739		23.3409
19.0134		22.6022
19.9414		23.3409
22.1247		23.5298
22.1075		22.2273
21.5183		22.9211
21.6549		22.9578
21.8704		22.6152
22.0708		23.1088
21.4878		23.6903
21.1824		23.1088
20.3648		22.1231
17.2926		21.8704
21.4878		23.6903
19.8513		20.4285
18.3533		17.299
22.5421		22.5421
20.3648		22.9578
22.0708		23.1088
22.4765		22.4953
20.8124		23.6903
20.4285		22.9211
22.1075		20.4285
17.2418		23.6903
17.2418		22.9578
21.6549		22.6356
17.2926		23.1088
17.5015		23.5298
18.3533		23.6903
22.1231		22.5421
21.8704		22.4953
21.9923		22.9211
22.0232		17.2418
22.1231
22.0708		23.6903
22.4953		22.9211
22.0708		23.6903
22.1075		22.9578
21.6549		22.5421
21.5183		22.6022
22.1247		23.3409
21.6549		22.0708
19.9414		22.779
22.0232		22.6356
17.2418		23.1088
17.6932		22.3137
22.4953		22.1075
20.8124		23.1088
17.2926		20.6949
21.5183		22.1075
18.1585		23.6903
21.1824		22.6152
		22.4765
21.5183		17.299
19.0134		21.1824
19.739		23.1088
17.2418		23.6903
19.9414		21.5183
18.1606		22.9578
20.3648		23.6903
21.4878		17.2418
21.5183		22.4953
17.6617		23.1088
19.2166		22.3137
18.6536		17.2418
22.0708		20.6949
17.5015		23.6903
21.4878		22.9211
21.9923		22.3137
21.9923		23.6903
22.2273		17.2418
19.739
		23.6903
17.671		17.5015
17.2926		17.2926
21.6549		22.6022
22.3137		19.739
22.4765		17.6989
21.8704		21.5183
17.5073		22.8433
21.2727		22.6022
17.6617		17.2418
		17.4766
17.671		23.6903
18.1585		23.6903
17.671		23.3409
22.0708		23.3409
22.1247		19.3306
20.8124		22.6152
21.2727		22.4765
19.2166		22.6022
20.4285		23.5298
17.5015		23.6903
21.5183		23.6903
20.3648		23.1088
21.1824		22.779
21.6549		23.3409
21.0057		22.3137
22.1075		22.6152
22.1231		22.1231
21.9923		23.5298
21.8704		23.3409
22.0708		22.6022
22.1247		22.779
22.1075		21.8704
21.9923		21.8704
22.1231		22.1231
22.0809		23.5298
21.8704		23.5298
21.8704		23.6903
22.0232		23.5298
21.4878		22.5421
21.9923		22.9211
17.4766		23.1088
17.5721		22.3137
21.6549		22.4953
19.2166		23.5298
21.2727		23.1088
21.9923		22.9578
22.0708		23.1088
17.2926		23.5298
21.8704		22.6356
22.0708		22.779
22.0809		22.9578
22.0809		22.3137
17.4766		21.2727
19.9414		22.4953
22.0232		22.1247
22.0708		22.2273
21.2727		23.501
17.5015		22.5421
17.5073		22.0708
20.8124		22.4953
19.3306		23.3409
21.2727		17.299
21.5183		22.4953
18.5479		22.779
22.1075		23.3409
22.1231		22.0708
22.4953		21.9923
21.8704		22.6356
22.0232		22.9578
19.3306		22.9211
21.2727		22.4953
21.9923		22.3137
22.0809		22.3137
21.9923		22.1247
21.9923		20.1807
19.0134		21.8704
21.8704		19.3306
21.8704		22.6022
22.2273		22.1075
22.0809		23.3409
22.0232		22.1075
22.0809		22.1075
19.0134		21.5183
21.5183		22.9211
22.5421		21.9923
22.6152		23.1088
22.4953		23.501
22.0708		18.3533
22.5421		20.3648
22.9211		22.6356
22.4765		19.2166
22.5421		22.2273
17.4766		23.1088
22.5421		21.2727
21.9923		22.4765
22.6356		23.1088
22.2273		22.1247
21.4878		19.2166
22.6356		22.0708
22.0708		22.6356
22.6356		22.0232
22.5421		23.1088
22.0809		22.4765
22.4953		21.9923
22.0708		22.6356
22.4953		21.6549
22.3137		23.6903
22.4765		21.0057
22.1231		22.8433
22.0232		21.8704
22.4765		23.1088
22.3137		22.8433
22.0809		23.1088
22.1247		22.6152
22.1231		22.9578
22.1075		22.5421
22.2273		17.671
22.1231		23.3409
22.9211		22.2273
22.1247		23.3409
22.1247		22.6152
20.3648
21.2727		22.6022
22.1075		23.3409
21.1824		17.4766
22.4765		21.6549
22.2273		22.3137
22.2273		23.1088
21.9923		23.3409
22.2273
22.5421		22.4953
22.5421		22.9578
22.1075		22.4953
22.3137		23.3409
21.9923		20.1807
22.1247		22.1231
22.2273		20.4285
17.4766		22.1231
22.4765		22.6356
22.2273		22.9211
23.5298
22.6356		22.4765
22.6356		23.3409
22.1075		22.6022
20.1807		21.1824
21.4878		22.779
21.0057		23.3409
22.0708
22.0708		19.8513
17.671		22.5421
20.8124		19.739
22.0708
21.2727		22.4765
23.5298		22.4953
21.1824
22.1075		20.1807
21.8704		17.671
22.0708		17.5015
21.0057		17.6619
21.9923		21.4878
21.1824
21.1824		19.9414
21.9923		22.0809
20.8124		20.4285
22.1231
21.9923		18.7596
22.0708		21.0057
22.1075		22.9211
21.1824
21.2727		17.2926
21.6549		22.6022
22.0809
20.8124		17.6619
20.8124		22.0232
22.0708		19.2166
21.8704		18.6536
21.8704		17.2418
22.0809		22.0232
22.0232		22.6356
21.5183		19.3306
20.6949		22.3137
21.5183		17.2926
21.1824		17.5721
21.4878
21.1824		19.8513
21.1824		21.4878
19.8513		21.4878
20.6949		21.6549
22.0708		19.5233
18.6536		18.6536
22.0232		17.4766
22.6152		17.2418
21.1824		17.671
21.5183		23.501
18.1606		22.0232
21.5183		17.299
21.5183		17.4766
21.6549
19.8513		20.6949
21.2727		17.6932
20.3648		19.739
20.4285
19.0134		17.6617
19.2166		22.1247
21.9923		22.1075
21.2727		22.4765
22.0232		23.3409
21.9923		18.6536
22.0708
21.9923
21.8704		23.6903
22.1075		23.3409
22.0708		22.1075
22.0809		22.9211
21.5183		23.501
20.3648		23.1088
19.3306		23.6903
21.0057		17.6989
21.6549		23.501
19.5233		23.3409
21.5183		23.1088
21.1824		22.6022
17.9841		22.9578
18.6536		22.4953
17.9841		22.4953
		22.6356
22.0809		23.1088
21.1824		22.4765
19.9414		22.6152
22.0809		21.4878
19.5233		22.6022
21.5183		23.3409
21.5183		22.6152
17.6932		22.3137
22.0708		22.779
21.9923		23.501
21.6549		22.8433
22.3137		23.6903
22.1075		19.5233
22.1075		18.6536
22.1231		22.4953
21.5183		22.4765
22.0708		22.2273
21.6549		21.4878
21.5183		22.6022
21.5183		18.5479
18.1606		22.0232
22.1231		21.6549
20.3648		21.6549
22.1231		18.1606
20.3648		21.2727
19.739		21.9923
21.4878		20.4285
21.6549		17.2926
21.5183		17.5015
22.0232		19.5233
21.9923		18.1606
22.0809		20.6949
20.3648		21.1824
22.1075		22.5421
22.1075		22.1247
22.0708		22.2273
19.8513		22.3137
21.5183		22.6022
22.0232		19.739
21.9923
22.1075		19.0134
22.4765
21.5183		21.2727
22.1075		20.3648
22.0809		19.2166
22.0809		18.7596
22.1075		22.1247
22.0809		18.6536
22.1231		17.6619
22.0232		18.1585
20.3648		20.6949
17.2926		17.2926
19.9414		21.2727
21.5183		17.6619
20.3648		17.2926
21.9923		21.2727
21.6549		19.2166
21.6549		21.1824
17.299		21.5183
20.8124		21.2727
18.3533		19.2166
21.9923		22.4953
22.0809		21.2727
21.9923		19.3306
22.0232
22.1231		22.1075
21.2727		17.6617
22.0232		17.5015
20.8124		18.7596
21.5183		22.6022
22.1231		17.6619
22.1075		19.0134
19.8513		20.6949
22.0232		21.2727
19.739		22.3137
20.8124		23.3409
20.3648		17.6617
17.2418		22.1075
20.6949		17.6617
22.0232		19.3306
22.1247		21.6549
18.6536		21.0057
22.2273
22.3137		23.5298
22.2273		21.2727
22.1247		22.1075
22.1247		22.4765
22.1075		19.739
22.0708		21.8704
22.1247		22.2273
22.1247		22.0232
22.1231		22.0232
21.9923		17.4766
21.5183		22.4953
21.5183		21.1824
22.1247		18.1606
22.0708		22.3137
22.1075		20.3648
22.0809		17.5015
22.0232		19.2166
22.1247		22.1231
22.0232		22.4765
21.4878		22.2273
22.1231		23.1088
22.0708		18.3533
19.3306		22.0232
21.0057		22.0232
22.3137		20.3648
22.2273
22.1231		22.0708
22.4765		20.1807
22.2273		17.299
22.3137		22.1247
17.299		22.1075
22.1247		21.8704
22.0232		22.0232
22.0708		22.1247
20.3648		18.7596
22.0809		21.9923
22.1247		18.5479
22.1075		22.9211
21.9923		18.7596
21.9923		21.2727
21.4878		19.0134
21.5183		21.4878
22.4765		21.9923
20.1807		18.7596
21.9923		21.9923
22.1247		22.6356
21.0057		22.4953
22.1247		19.8513
22.2273		21.9923
22.0809		21.4878
18.3533		18.5479
19.5233		22.0232
21.5183		21.0057
22.0232		21.2727
22.1075		21.8704
22.1231		17.6619
21.8704		18.1606
		19.5233
		21.2727
		17.6989
		18.1606
22.1247		22.0232
20.4285		21.2727
19.5233		19.8513
17.5073		18.1606
22.0232		22.0232
21.5183		19.5233
17.6932		17.5073
22.0708		18.7596
21.4878		22.9578
22.0232		22.8433
21.9923		22.1075
20.6949		21.1824
22.1231		17.6617
20.8124		21.8704
21.2727		22.6152
20.8124		19.0134
21.6549		22.6022
22.1231		17.9841
19.8513		17.5721
22.0809		17.2926
21.4878		22.1247
21.5183		17.5721
22.1231		21.0057
21.9923		20.1807
21.8704		17.9841
22.0809		22.1247
17.5015		22.9578
22.4953		21.8704
17.5015		21.9923
17.5721		23.6903
21.0057		22.1231
21.2727		18.3533
22.0232		22.9578
21.9923		17.5721
17.299		19.2166
18.5479		21.0057
19.739		23.3409
18.5479		18.3533
20.8124		21.1824
17.6619		21.6549
17.6619		20.8124
23.1088		19.9414
19.2166		19.0134
20.4285		21.1824
18.7596		22.6022
21.9923		22.3137
21.0057		18.3533
21.5183
21.8704		18.3533
20.8124		17.5721
21.1824		19.9414
20.3648		22.0708
20.4285		21.1824
20.3648		19.5233
20.1807		19.9414
21.5183		17.5721
21.5183		17.5015
19.739		17.2926
20.6949		17.299
17.5073		18.1606
17.9841		21.1824
19.5233		18.5479
21.2727		22.6152
21.9923		17.299
20.3648		19.5233
20.3648		21.1824
19.9414		23.6903
18.1585		20.1807
20.1807		17.5073
19.0134		21.6549
		19.739
		20.4285
18.1606		17.5073
21.1824		18.1585
21.1824		23.501
18.5479		21.6549
20.1807		22.3137
19.0134
21.5183
19.0134
17.2926
20.6949
18.1585
18.3533
18.1606
20.6949
17.671
18.6536
19.8513

## Sheet: Fig 1- Supp 1B
1	2	3	4	5
68.1805		33.5443	33.5172	44.5105
32.1722		38.3715	48.5318	45.6401
30.3909		212.208	112.232	43.205
50.1566		65.0877	59.0963	104.024
57.1615		187.104	51.4862	72.0114
80.2191		50.8706	31.5255	57.446
45.8683		61.9814	36.4198	93.7642
43.6329		49.5878	76.1542	48.7319
44.8462		86.0185	56.5473	32.9917
68.146		115.737	85.8443	36.9605
30.8561		67.7182	102.305	56.6524
38.7917		41.7054	31.8152	58.2072
38.0219		46.5375	63.6232	139.288
46.7291		63.3588	138.011	58.7157
39.7289		184.576	108.895	66.7272
30.6387		34.913	77.3996	44.8459
63.0859		31.8029	30.3704	51.8216
59.1926		41.7442	110.369	59.0662
62.0434		31.2291	149.136	60.7957
104.099		31.0976	60.7557	73.7397
61.4971		32.464	79.209	76.3988
55.6484		58.345	155.733	48.7105
61.9333		50.6147	112.062	111.732
31.8559		78.5499	37.0958	70.5774
68.6004		244.112	58.8612	60.497
57.4775		76.0431	89.5421	90.7352
81.9674		33.6403	79.8558	152.252
69.569		203.131	104.749	129.543
33.0693		90.626	45.5469	41.1928
38.6193		99.7725	72.7979	30.5194
42.0382		67.9233	87.0576	46.1764
57.9203		62.921	38.7681	131.345
70.1638		75.9543	153.353	90.2837
45.6805		75.583	144.931	70.8472
42.229		38.9142	99.8951	64.3578
62.3535		81.5153	72.6588	110.957
48.3092		70.7403	114.307	92.1956
68.7116		93.2945	60.0929	38.0145
58.5062		39.524	173.906	41.0907
37.7002		38.451	153.424	69.5763
50.1867		48.7134	44.1679	108.681
59.2522		44.4341	102.087	46.0444
85.7647		36.602	66.5827	37.8572
67.3524		62.0752	48.9385	47.9047
32.707		41.4107	143.214	43.7667
49.762		73.8272	110.061	51.451
44.2424		34.633	136.322	98.8811
50.1508		115.544	77.6337	82.0812
42.8284		72.1249	108.267	82.4365
52.5027		52.2444	207.133	79.1548
46.6635		31.888	119.448	121.405
44.4234		50.1493	155.623	69.7146
35.9855		83.1516	110.197	207.024
45.4122		98.1033	107.282	41.9876
49.8375		31.0563	46.9777	62.111
38.5256		35.0435	47.7561	66.8716
77.5514		84.429	81.9405	66.3294
66.95		45.9119	79.1052	41.3344
92.1233		30.9505	55.595	104.654
36.4083		54.3185	44.749	67.7565
33.6588		30.5233	115.633	42.3521
48.3851		251.674	73.0553	71.1359
69.3426		41.4344	144.552	40.4468
88.7092		33.8335	101.841	103.723
56.8673		60.7743	129.301	36.7228
46.5943		54.0292	192.42	35.7607
74.2675		34.0512	145.956	53.218
35.5512		47.1225	91.2138	38.1818
51.5073		39.5921	112.691	46.5182
73.6807		30.0257	104.873	88.3519
53.336		48.4559	106.649	67.8168
93.8342		43.2386	46.396	93.001
67.9748		268.696	98.4357	78.3103
73.2264		41.7426	144.739	81.8182
58.6381		51.7384	56.2104	59.9379
72.4462		64.1932	112.241	42.3646
45.3911		31.1971	55.7731	33.1708
115.849		74.1284	78.7387	62.0626
36.4695		115.596	88.7165	66.2087
81.9329		100.639	156.279	38.377
82.0647		33.4328	67.4847	40.2553
35.1246		40.8595	106.258	96.0394
65.5429		42.3905	131.624	156.847
59.4135		45.8798	108.182	68.2913
74.2632		35.5821	91.9982	50.1721
40.7155		32.2021	130.57	110.017
32.3477		45.2537	97.0974	150.774
31.5037		306.31	126.733	40.7118
39.2413		54.7314	95.7149	88.9353
35.7485		66.4685	130.36	59.5262
36.7584		76	123.396	92.2844
30.2404		68.1908	90.5748	137.687
39.9032		92.0746	37.946	70.1966
31.0108			62.4487	112.131
41.9099			100.17	64.7835
49.3808			78.3889	81.5768
41.8082			60.4446	63.6484
46.8895			49.9335	49.818
57.9227			60.2018	32.2022
43.0311			90.6381	44.9383
52.7607			101.328	72.9994
59.2226			95.5972	47.8565
82.5079			89.6137	101.684
55.2814			110.353	36.0969
34.9177			72.8809	34.9943
34.5418			75.991	57.0575
94.4487			149.336	146.038
66.2727			136.619	143.381
58.2356			82.9246	79.958
33.1076			134.795	80.8025
38.6544			54.913	49.248
34.7193			41.0273	70.2014
61.5391			75.5968	32.8119
31.8033			61.9873	65.2939
30.967			47.6101	62.1976
52.7635			86.184	62.0395
31.4907			121.276	98.5133
43.2804			60.7843	100.05
49.1157			30.7083	76.1133
53.7255			207.371	87.5732
35.2561			71.6713	162.07
45.5507			222.034	51.8077
77.5813			56.3586	65.1785
36.1197			44.8856	54.2879
60.3175			55.0858	146.217
54.999			137.65	65.007
30.7829			71.3153	104.417
59.782			161.634	35.048
59.7386			33.5747	55.6622
48.1219			87.2808	113.088
33.2909			82.967	65.8546
34.4398			158.226	83.2383
36.4434			83.7954	95.2991
118.447			38.024	48.6086
90.9891			97.5793	50.7064
55.61			104.479	76.2575
45.2928			82.9308	50.7942
40.7925			331.339	44.5815
52.9836			189.647	61.9344
37.2923			80.0056	51.8317
65.5542			68.5628	171.041
47.8566			52.5203	169.203
39.0033			136.573	62.8571
48.7235			183.755	58.5447
83.4377			169.642	54.5473
31.4144			138.024	71.8707
35.0797			136.276	92.2501
40.1307			139.578	76.4438
51.6638			118.22	37.9468
32.668			106.392	56.1828
33.214			205.757	31.659
53.3008			247.773	34.1949
33.4622			189.115	35.5204
38.2488			305.262	59.5392
53.4809			187.725	166.144
50.1882			176.755	77.7287
35.8297			64.2799	57.4713
38.0334			147.428	47.3449
132.368			95.9982	48.3672
42.9359			57.061	49.5658
30.1613			135.286	45.0404
36.0503			85.6768	58.1447
51.8664			250.484	38.6527
35.0877			164.773	49.8541
33.5382			219.608	63.6405
50.1386			166.754	34.8894
34.533			122.532	41.1587
37.679			92.3114	62.1904
34.959			189.664	32.7679
111.15			118.53	36.2029
37.9486			151.049	40.4088
33.9028			177.449	46.4121
43.1017			95.2067	34.559
43.6046			112.857	34.9386
35.1019			58.3592	44.4103
47.7358			206.064	141.249
34.4091			110.171	59.4096
35.9148			154.877	34.11
34.7993			244.126	30.1348
39.781			121.662	63.7695
36.8192			54.7961	30.1844
98.9995			85.0407	34.0614
68.8073			178.738	30.4799
68.0325			321.685	35.8113
56.5936			71.4778	42.5743
47.5511			82.0367	33.3333
106.1			118.798	38.3814
110.907			77.1536	51.1251
137.764			100.735
53.1104			61.5379
42.83			134.381
53.9868			71.5493
38.1502			63.4837
73.0172			44.6583
46.6993			124.694
93.4783			157.913
47.6577			83.5527
41.8454			62.1784
36.9979			159.112
46.8283			167.079
52.8779			50.6691
93.1257			40.499
99.6973			57.4706
49.7129			52.1529
76.1989			40.6953
48.6237			147.839
40.5654			70.4738
36.8302			36.3032
34.9988			52.4506
44.1253			69.0196
52.5596			95.721
127.595			68.1747
40.599			46.0493
88.3568			54.8236
100.036			126.073
47.5253			42.2731
57.1753			53.5777
49.6061			62.2743
40.8794			34.3263
65.5761			49.9752
51.9628			51.1544
48.8492			93.7688
30.1461			83.6204
147.658			55.7152
38.1624			39.2792
31.9786			67.1914
47.0958			163.035
39.2609			61.1059
38.5209			66.8641
46.544			47.2895
54.0863			45.1303
82.7023			40.4722
46.2763			49.9628
43.8211			70.584
34.492			174.41
46.8053			191.148
32.4799			63.9713
76.3044			73.4107
32.1652			48.4718
31.6146			44.2657
38.0364			41.8703
32.371			78.4173
46.3677			37.6407
31.6676			96.677
37.5257			37.0993
32.4948			51.1804
38.261			141.132
48.4571
30.678
30.7406
40.2748
38.9053
118.385
64.4374
57.3731
43.7721
60.6358
55.5881
57.2427
40.8984
61.7909
52.6847
49.4552
35.5493
41.0939
93.887
30.1197
39.829
378.377
42.7655
44.3061
54.0294
71.5597
84.8485
67.3944
44.7532
35.1092
34.6483
40.8663
35.591
140.321
30.6505
45.1791
152.306
61.6187
46.2647
68.2571
118.885
34.3826
50.7171
38.1667
30.4308
51.0921
31.9278
30.4284
35.2703
31.1804
87.2375
58.8749
35.8348
38.9671
34.089
35.5759
72.9934
81.6231
38.0111
69.3491
89.158
36.5763
30.5034
32.5885
31.3611
46.2078
71.5465
31.2958
50.7953
30.7474
41.279
33.6336
38.4004
33.2979
33.4957
	30.843
	41.7574
	33.7577
	31.566
	35.9513
	40.4361
	34.2771
	41.8907
	51.5378
	42.1727
	131.694
	61.9378
	32.615
	32.8238
	32.1009
	46.3741
	45.6166
	47.0304
	105.145
	99.4126
	135.859
	50.8185
	52.2541
	46.8718
	32.6348
	43.903
	33.1242
	48.6983
	65.91
	113.333
	33.2259
	68.0659
	42.2703
	71.7321
	53.6996
	40.2787
	108.03
	42.53
	40.3358
	70.5197
	43.9326
	37.8989
	39.9445
	51.2598
	30.8145
	55.3025
	32.8063
	49.1474
	53.2118
	62.1306
	36.2366
	42.3811
	70.3935
	35.6009
	47.0636
	45.5009
	63.4361
	35.2574
	34.7241
	71.1268
	51.7129
	43.2142
	79.8191
	63.3702
	38.5885
	42.6929
	48.115
	49.1296
	32.6208
	34.8948
	36.7464
	38.1086
	65.4295
	40.0143
	38.5243
	45.679
	40.1929
	39.2946
	31.9887
	39.378
	52.7476
	52.7829
	44.7194
	33.1132
	35.9451
	97.4857
	45.9204
	31.1753
	34.2552
	32.2789
	48.9591
	73.3724
	44.1702
	39.2623
	76.1616
	127.838
	156.318
	54.0825
	46.9836
	34.6784
	59.4178
	80.1486
	38.8522
	108.502
	101.863
	43.0831
	95.1848
	51.9317
	38.4189
	82.9212
	44.5324
	72.7766
	31.6831
	58.428
	54.9651
	45.4225
	51.7302
	41.8872
	39.1335
	63.6745
	41.891
	58.271
	34.3662
	41.8285
	41.0273
	53.7766
	67.8351
	69.2754
	142.524
	39.9812
	46.8184
	60.0168
	66.1326
	69.4506
	106.6
	58.0942
	36.7936
	35.443
	35.5735
	34.7974
	46.6718
	44.9353
	62.4637
	56.0684
	37.5294
	31.637
	85.6457
	54.6961
	36.8554
	34.6559
	38.415
	56.7523
	56.842
	36.6284
	36.005
	35.1391
	47.1426
	42.0746
	34.5558
	31.6845
	54.534
	96.8418
	32.8179
	51.3794
	35.9094
	78.4621
	44.3159
	34.0181
	49.615
	40.7819
	125.908
	127.762
	53.3886
	105.257
	170.589
	52.26
	48.9404
	45.818
	65.5262
	68.2316
	66.4269
	54.8413
	145.813
	89.0211
	103.33
	52.2489
	88.8508
	77.561
	55.4591
	149.475
	44.123
	50.4656
	116.954
	77.746
	49.8891
	64.7799
	102.061
	55.5965
	42.3196
	66.7504
	32.3728
	97.9868
	52.2062
	34.849
	91.3655
	100.39
	42.832
	36.5385
	63.8554
	55.9767
	56.687
	31.6179
	30.7608
	41.2381
	43.4948
	92.2171
	42.7788

## Sheet: Fig 1- Supp 1C
1	2	3	4	5
18.6536	22.4765	17.2418	22.1075	23.3409
17.299	21.4878		22.4765	22.6022
17.299	21.1824	17.671	23.3409	23.3409
18.3533	19.3306	18.1606	18.6536	23.5298
18.1606	19.0134			22.2273
18.5479	19.5233	18.1606		22.9211
17.2418	19.8513		23.6903	22.9578
17.5015		21.2727	23.3409	22.6152
17.5015			22.1075	23.1088
19.2166			22.9211	23.6903
17.671		22.1231	23.501	23.1088
18.1585		21.8704	23.1088	22.1231
19.5233	18.1585	18.7596	23.6903	21.8704
17.5721		23.501	17.6989	23.6903
18.3533		18.3533	23.501	20.4285
17.2926	17.6619	22.5421	23.3409	17.299
17.299	19.5233		23.1088	22.5421
17.299	17.671	23.3409	22.6022	22.9578
18.3533	21.0057		22.9578	23.1088
18.1606			22.4953	22.4953
18.3533			22.4953	23.6903
18.1585			22.6356	22.9211
17.6617	17.6932	21.4878	23.1088	20.4285
18.1585	19.0134		22.4765	23.6903
17.6617		17.299	22.6152	22.9578
18.1585			21.4878	22.6356
18.3533			22.6022	23.1088
19.739	17.5015		23.3409	23.5298
18.1606			22.6152	23.6903
			22.3137	22.5421
17.4766	22.0232		22.779	22.4953
22.4953	19.3306		23.501	22.9211
	21.4878	22.0809	22.8433	17.2418
19.5233	21.2727	19.2166	23.6903
	17.6617		19.5233	23.6903
	22.6356	18.7596	18.6536	22.9211
18.7596	20.1807		22.4953	23.6903
17.5073	22.0708		22.4765	22.9578
17.5721	18.7596		22.2273	22.5421
22.5421	19.2166		21.4878	22.6022
19.0134	20.6949	21.1824	22.6022	23.3409
18.5479	22.5421		18.5479	22.0708
20.3648	20.6949	21.5183	22.0232	22.779
	21.8704	18.5479	21.6549	22.6356
	18.7596		21.6549	23.1088
17.9841	19.9414	23.5298	18.1606	22.3137
	19.5233		21.2727	22.1075
18.6536	22.2273	18.6536	21.9923	23.1088
19.5233			20.4285	20.6949
17.2418	18.5479		17.2926	22.1075
17.299	22.6152		17.5015	23.6903
19.3306	20.3648		19.5233	22.6152
17.6617	18.1606		18.1606	22.4765
17.6989		19.2166	20.6949	17.299
17.6619	17.6989	23.6903	21.1824	21.1824
17.6932		19.0134	22.5421	23.1088
18.1585		23.3409	22.1247	23.6903
18.6536	17.299		22.2273	21.5183
17.299	19.3306	23.1088	22.3137	22.9578
17.671	17.2926		22.6022	23.6903
17.2926		19.3306	19.739	17.2418
17.2926		17.5015		22.4953
18.1606	22.1231		19.0134	23.1088
19.3306		19.0134		22.3137
17.6619	19.9414		21.2727	17.2418
	17.6932	17.671	20.3648	20.6949
17.299	22.1247		19.2166	23.6903
18.1606	17.671		18.7596	22.9211
19.3306	22.779		22.1247	22.3137
			18.6536	23.6903
17.4766	18.1606	19.8513	17.6619	17.2418
17.4766	20.6949	21.6549	18.1585
17.5073			20.6949	23.6903
20.3648	19.739	22.1075	17.2926	17.5015
21.0057	18.6536	17.2418	21.2727	17.2926
17.6617	17.6932	20.4285	17.6619	22.6022
	19.2166	19.2166	17.2926	19.739
	19.5233		21.2727	17.6989
			19.2166	21.5183
17.671	22.9578		21.1824	22.8433
18.6536			21.5183	22.6022
17.671			21.2727	17.2418
	18.7596	19.2166	19.2166	17.4766
18.5479	21.4878	19.2166	22.4953	23.6903
19.2166	18.3533		21.2727	23.6903
17.2926			19.3306	23.3409
17.6619				23.3409
17.6619	17.6932		22.1075	19.3306
19.9414	17.299	17.9841	17.6617	22.6152
		17.4766	17.5015	22.4765
17.6619	19.2166		18.7596	22.6022
17.4766	17.299	22.0809	22.6022	23.5298
21.0057	17.6619	22.5421	17.6619	23.6903
22.6356	23.1088	19.739	19.0134	23.6903
		20.1807	20.6949	23.1088
22.6356	19.3306	17.6932	21.2727	22.779
22.2273	22.6152	19.2166	22.3137	23.3409
19.8513	23.501	18.1606	23.3409	22.3137
19.0134		21.0057	17.6617	22.6152
23.501		19.8513	22.1075	22.1231
22.1075		17.299	17.6617	23.5298
17.671	21.4878	19.3306	19.3306	23.3409
	17.2418	20.6949	21.6549	22.6022
17.6619		18.7596	21.0057	22.779
		17.6932		21.8704
	17.5073	17.299	23.5298	21.8704
17.6932	17.6617	18.7596	21.2727	22.1231
	22.1231	22.6152	22.1075	23.5298
			22.4765	23.5298
		17.299	19.739	23.6903
	17.2926	21.4878	21.8704	23.5298
	22.1231		22.2273	22.5421
	18.5479	17.299	22.0232	22.9211
		21.4878	22.0232	23.1088
	17.5015	17.299	17.4766	22.3137
	17.2926	17.299	22.4953	22.4953
	17.4766	17.4766	21.1824	23.5298
			18.1606	23.1088
			22.3137	22.9578
			20.3648	23.1088
17.4766			17.5015	23.5298
	18.3533	17.6619	19.2166	22.6356
			22.1231	22.779
17.5721	18.7596		22.4765	22.9578
			22.2273	22.3137
	18.3533	18.1585	23.1088	21.2727
22.6356	20.6949	19.8513	18.3533	22.4953
	18.1585	20.3648	22.0232	22.1247
		17.299	22.0232	22.2273
17.6619	22.2273	17.5015	20.3648	23.501
17.2418	17.6932			22.5421
17.4766		21.4878	22.0708	22.0708
17.671		17.299	20.1807	22.4953
17.6617	22.1247		17.299	23.3409
19.9414		17.299	22.1247	17.299
19.0134		17.5015	22.1075	22.4953
19.9414	17.2926	20.6949	21.8704	22.779
17.6619		17.5015	22.0232	23.3409
18.3533			22.1247	22.0708
17.9841			18.7596	21.9923
19.0134		18.1585	21.9923	22.6356
		17.6932	18.5479	22.9578
18.6536		17.5721	22.9211	22.9211
17.2418			18.7596	22.4953
		17.6617	21.2727	22.3137
17.5721	17.5073	17.299	19.0134	22.3137
17.671	17.299		21.4878	22.1247
	19.8513	19.3306	21.9923	20.1807
17.6619	17.2926	18.7596	18.7596	21.8704
19.0134		17.6932	21.9923	19.3306
19.3306	17.2418	18.7596	22.6356	22.6022
17.2418		17.6932	22.4953	22.1075
17.2926		17.6989	19.8513	23.3409
17.299		17.6932	21.9923	22.1075
18.1585	17.5015	19.5233	21.4878	22.1075
19.3306	18.3533	22.9578	18.5479	21.5183
17.671		19.2166	22.0232	22.9211
18.5479			21.0057	21.9923
17.6932		17.6932	21.2727	23.1088
19.2166		18.6536	21.8704	23.501
19.739	17.6619	20.4285	17.6619	18.3533
20.1807		19.5233	18.1606	20.3648
17.4766	22.3137	17.6932	19.5233	22.6356
17.671	22.8433		21.2727	19.2166
17.2418		17.6989	17.6989	22.2273
19.8513			18.1606	23.1088
17.2418		19.9414	22.0232	21.2727
20.1807		20.6949	21.2727	22.4765
		20.6949	19.8513	23.1088
18.7596		17.6932	18.1606	22.1247
		19.5233	22.0232	19.2166
17.671		19.9414	19.5233	22.0708
17.671		19.5233	17.5073	22.6356
17.6932		18.1585	18.7596	22.0232
19.739		17.6932	22.9578	23.1088
	22.1231	17.5721	22.8433	22.4765
18.7596		17.6932	22.1075	21.9923
17.5015		17.6989	21.1824	22.6356
17.671		17.6619	17.6617	21.6549
		20.4285	21.8704	23.6903
17.299		18.7596	22.6152	21.0057
	19.9414	19.3306	19.0134	22.8433
17.671			22.6022	21.8704
		17.5015	17.9841	23.1088
17.671		18.3533	17.5721	22.8433
17.5015			17.2926	23.1088
			22.1247	22.6152
21.5183			17.5721	22.9578
21.4878		20.4285	21.0057	22.5421
20.8124		17.6932	20.1807	17.671
18.5479	17.9841	20.1807	17.9841	23.3409
17.671		20.1807	22.1247	22.2273
19.2166			22.9578	23.3409
17.299	17.6617		21.8704	22.6152
17.671			21.9923
20.4285	20.8124		23.6903	22.6022
20.1807	17.4766		22.1231	23.3409
			18.3533	17.4766
18.3533	17.5015		22.9578	21.6549
			17.5721	22.3137
19.2166	22.4953		19.2166	23.1088
19.5233	19.3306		21.0057	23.3409
17.299	17.5073		23.3409
17.6989			18.3533	22.4953
17.6617			21.1824	22.9578
22.9211	17.5073		21.6549	22.4953
20.8124	17.5721		20.8124	23.3409
	18.3533		19.9414	20.1807
19.2166			19.0134	22.1231
	17.299		21.1824	20.4285
	17.5073		22.6022	22.1231
17.6989	18.6536		22.3137	22.6356
17.6932	22.8433		18.3533	22.9211
	19.9414
17.5721	18.5479		18.3533	22.4765
			17.5721	23.3409
	17.4766		19.9414	22.6022
21.1824	18.1585		22.0708	21.1824
19.8513	20.1807		21.1824	22.779
17.2926	18.7596		19.5233	23.3409
	17.9841		19.9414
17.6989	19.9414		17.5721	19.8513
17.5073			17.5015	22.5421
	20.3648		17.2926	19.739
18.6536	21.5183		17.299
19.0134			18.1606	22.4765
	18.3533		21.1824	22.4953
19.9414	17.5015		18.5479
17.5073	22.6356		22.6152	20.1807
	19.739		17.299	17.671
19.5233			19.5233	17.5015
19.8513	17.4766		21.1824	17.6619
18.1606			23.6903	21.4878
			20.1807
	17.4766		17.5073	19.9414
			21.6549	22.0809
			19.739	20.4285
17.6989			20.4285
			17.5073	18.7596
17.299			18.1585	21.0057
	17.5721		23.501	22.9211
	17.5721		21.6549
			22.3137	17.2926
				22.6022
	19.8513			17.6619
				22.0232
17.9841	17.2418			19.2166
17.299				18.6536
22.0809	17.5721			17.2418
22.1075				22.0232
19.2166				22.6356
17.5073	17.6989			19.3306
19.5233				22.3137
	17.5073			17.2926
	19.5233			17.5721
17.4766	17.6619
19.739	17.6989			19.8513
	23.6903			21.4878
17.299	17.299			21.4878
				21.6549
19.5233	17.299			19.5233
18.7596				18.6536
20.4285	19.739			17.4766
	18.1606			17.2418
17.6989	17.9841			17.671
18.6536	18.1585			23.501
20.4285	17.4766			22.0232
19.3306				17.299
19.2166	17.9841			17.4766
	17.299			20.6949
17.6932	17.299			17.6932
				19.739
18.1606
19.5233				17.6617
				22.1247
	17.671
17.671
19.9414	17.2418
17.5721	17.6932
17.2418	17.6932
17.671
17.6989
18.6536
17.2418	20.1807
	17.6932
19.2166	18.1585
17.6617
20.6949	17.671
20.1807	19.5233
19.8513
17.6619
19.9414
19.0134	17.299
	17.299
22.1247	18.7596
18.3533	18.1606
17.299	17.299
18.1606	18.1606
19.0134	17.4766
19.3306	18.6536
17.2926	17.9841
22.3137
17.4766
17.2926
17.671	21.4878
17.6989	20.1807
20.3648
18.7596
	18.7596
17.299	17.671
19.0134
22.0809	17.5721
17.299	18.5479
	21.0057
	19.2166
17.671	17.2418
17.299	17.5073
	18.5479
17.2926
21.1824
18.5479
22.9211
	18.1606
17.2926	18.6536
19.8513	20.3648
17.4766	20.4285
17.299	19.5233
18.7596
17.6989	17.6619
	17.5721
18.3533	18.1585
17.671	17.9841
	19.739
	19.739
17.4766	22.3137
	19.8513
	17.9841
	19.739
	21.0057
21.1824	18.5479
17.299	18.5479
20.3648	17.6617
22.2273
17.6619	18.5479
17.299	18.6536
	18.1585
	17.9841
23.3409	18.5479
	18.5479
17.4766
	19.739
	17.6619
19.0134	19.9414
	19.8513
	18.5479
17.6989	17.5721
18.5479	20.1807
	20.3648
17.2418	19.3306
	18.1585
17.2926
17.2926	18.3533
	17.6989
	17.299
	17.2418
	18.5479
	18.6536
	17.6619
17.299
17.6932
22.779
17.2926
17.2418
17.299
17.5073
17.299
17.2926
19.5233
17.2926
17.6619
17.6619
17.2418
17.2926
19.3306
17.6932
19.5233
17.6989
19.0134
19.2166
18.1585
17.2926
17.6989
18.1606
18.6536
17.6989
17.5015
17.5015
17.6989
17.6617
19.739
19.0134
17.4766
20.6949
17.6619
18.3533
17.6619
17.671
19.3306
19.739
17.9841
19.2166
17.5073
17.5721
19.0134
17.6617
19.2166
19.739
18.6536
17.671
17.2926
17.2926
17.6619
17.5015
17.5073
17.5721
18.3533
17.6619
21.0057
17.299
17.6932
19.2166
17.6619
21.8704
17.6619
17.5721
17.6617
17.5073
18.1585
18.1606
17.5721
17.6619
17.299
17.5721
21.0057
17.6619
17.2926
17.5015
18.5479
21.0057
18.5479
18.7596
20.4285
20.1807
18.1585
17.2418
17.6989
18.6536
17.6989
18.7596
17.6932
17.6989
17.6619
19.0134
18.1585
18.7596
17.5721
17.299
17.6619
17.9841

## Sheet: Fig 2C
control	20 μM EGTA + 0 Ca2+	20 μM EGTA + 0 Ca2+/NMDG		20 μM 5J4	TRPA1 KO	TRPC5 KO
42.6074	37.6589	32.4841		43.6352	52.7944	56.0671
55.8509	34.4144	44.8763		49.9798	37.9231	47.9666
71.0425	39.6493	33.266		63.7873	53.5994	51.8278
62.1327	32.7979	33.0874		92.9948	54.9318	49.7187
53.0622	30.5283	36.3664		78.7674	43.6248	54.0481
38.5247	33.6835	41.2304		98.447	32.8631	31.497
50.2519	31.4615	46.2991		65.7374	38.8612	57.099
57.7365	44.1728	32.8356		61.6625	36.8363	69.9169
42.3122	36.1373	41.8361		53.7341	46.6525	65.318
40.7507	36.9147	30.109		75.151	33.0582	55.2296
52.2156	53.6028	39.2674		61.3924	53.8433	54.4779
65.2851	35.7496	34.0887		77.6604	42.5787	60.8275
39.3902	33.3688	38.4076		54.5582	42.5299	50.0413
32.9238	43.4426	30.0901		67.6287	34.7031	44.1946
44.9905	37.8953	36.8711		115.319	32.6394	65.7822
43.4794	38.6814	37.415		40.0792	37.0892	55.6181
43.6066	30.9842	44.3923		41.5263	47.0661	31.4405
34.5664	39.8838	74.0106		74.7165	45.6816	59.4682
	37.3598	49.896		67.931	47.6884	65.5196
68.4481	40.4222	40.1439		50.0666	43.7268	69.1517
50.2105	31.3302	35.5843		37.4385	39.7895	48.5066
50.8147	36.3829	53.2947		72.5166	38.8128	36.4447
37.4011	30.2752	60.1422		51.5681	50.336	62.4766
39.4713	31.2346	75.5233		51.9494	53.8791	76.2682
	41.5697	44.9332		62.8311	44.3952	62.7447
45.4305	34.4242	35.7674		37.942	45.192	47.0989
39.8562	37.4877	38.0479		47.6441	34.5679	59.6642
49.8285	44.8305	53.1834		38.8465	37.1139	42.7899
36.6568	32.2521	34.8585		43.9923	33.0463	35.2308
53.3293	30.9723	33.1325		33.9491	31.5051	69.9412
46.8957	32.6175	40.0124		92.9276	36.3951	46.8588
48.9085	37.0287	39.2396		56.6402	35.5292	63.4036
44.0232	33.4562	41.2291		39.4017	47.9269	44.896
48.1217	35.407	69.8925		40.0398	46.5322	51.5949
32.6856	34.3946	41.5591		88.1395	74.1025	52.0565
44.8363	36.6159	35.6395		40.1861	51.5493	63.2641
43.9376	30.2292	45.8244		41.2447	47.4593	44.1518
42.2478	39.0037	39.3221		37.9828	52.9244	68.5167
55.0327	31.4932	33.766		43.5212	53.1739	69.0898
56.692	63.858	32.7002		34.4102	58.4196	68.5717
48.8972	30.9472	59.0083		62.0808	45.7099	73.4578
61.1316	35.6498	48.0326		35.5238	46.9965	74.1348
35.3721	35.6967	37.766		58.3675	55.1086	82.6184
30.5103	33.5662	49.0218		35.2501	43.6314	48.6961
36.2003	32.7176	56.7707		39.086	54.9818	85.4687
51.2462	32.3729	34.1471		89.2564	42.4766	38.129
38.1859	42.6039	30.908		48.5318	52.0199	76.5418
45.577	38.4763	38.883		44.0123	47.8804	61.475
42.0431	36.5355	40.5797		41.4025	42.9021	84.2374
33.472	30.3738	33.8112		38.9789	48.0229	56.8108
	34.0379	34.927		51.7834	54.7065	67.551
40.4867	43.3409	38.4294		38.0063	34.0713	61.7613
45.8264	32.4942	35.0265		52.1671	53.0055	58.6718
	37.6371	35.0386		49.2188	41.7923	55.7047
36.9404	33.7623	32.1778		53.181	57.5425	60.4833
34.7976	37.2937	33.1193		48.5222	72.5303	75.3943
42.8603	37.5241	31.5242		36.5871	53.4913	57.7331
61.3932	32.4914	31.2093		49.9806	47.993	66.8692
55.3398	35.3477	42.004		46.5554	41.8394	90.8741
52.9595	39.8696	44.5069		31.5964	38.3715	97.9809
43.9306	37.0269	34.598		60.4289	53.9078	51.9983
77.6776	42.5672	34.1951		43.0198	44.3137	47.7378
77.1132	32.717	32.2216		77.0948	40.3995	61.2999
84.3543	30.3541	46.5184		36.1011	49.7816	42.2621
56.1967	49.6038	37.47		70.111	62.3698	56.382
	51.537	49.2644		40.9844	72.7583	44.5808
39.9476	30.6563	39.0625		30.8444	74.6918	44.3669
61.1445	34.9002	41.2466		42.2268	46.213	46.1503
54.9617	32.3191	32.878		43.3445	63.6232	61.048
51.3284	36.6096	35.3882		41.9659	54.319	69.0313
45.3771	48.6775	38.2799		33.4922	50.2218	85.9629
39.1482	38.4195	31.5583		37.9945	47.4926	66.5032
49.0125	46.9313	35.1724		38.3582	33.5242	87.6055
47.5332	34.2271	35.5204		50.4044	37.4282	52.3648
55.6218	33.6882	32.3888		47.7316	34.1349	50.4515
37.6046	35.3209	36.6367		68.4598	47.7002	60.029
49.9504	38.873	41.3244		52.6088	32.2616	57.9627
51.0422	40.2685	42.7774		41.429	57.0805	46.989
49.1087	31.0765	43.7751		34.1546	38.1755	37.5661
45.1596		39.4792		48.8778	32.7177	35.8374
49.7886		40.9954		44.4529	38.1593	45.0277
35.4177	46.1308	31.4079		43.4317	53.7383	58.0016
41.9795	35.263	34.1384		55.7161	53.6335	74.1144
41.0983	33.6572	31.736		36.0059	44.8058	45.9685
47.9268	38.6818	46.2538		35.0382	44.8457	36.5029
49.1039	34.8975	40.467		44.6884	49.7363	43.096
43.6422	32.0832	32.5432		33.5744	41.6031	38.0314
60.2967	30.9545	39.3306		32.4638	41.1519	55.6129
66.5109	34.9417	44.2442		63.1455	56.3866	42.2655
35.2417	34.1726	40.4082		55.2219	56.8989	46.3311
77.8709	37.3815	48.3882		52.1288	42.1439	46.1722
51.3875	37.2549	32.7976		55.8391	46.9315	56.0771
47.7162	39.4749	35.9567		31.3433	63.66	50.7927
46.087	41.2238	84.2424		32.0878	54.0636	43.9794
47.8985	32.6241	45.6248		44.3775	48.4111	49.1549
41.429	31.9211	30.5898		60.0843	51.25	54.1548
55.2814	41.9166	36.3862		103.534	61.9886	60.0949
49.4157	32.5252	46.5926		30.7988	57.429	61.4496
56.9937	36.3143	37.4182		47.5259	67.67	53.9383
50.4553	38.9939	35.8529		34.7697	52.9797	58.4605
34.1116	31.6418	36.2932		41.5523	50.4453	42.3997
49.5695	38.8093	35.8237		50.2535	42.029	49.3333
55.231	38.425	45.8778		55.9243	66.9931	32.856
34.2804	79.1526	32.8294		91.8341	45.7991	36.8305
40.6601	44.7789	32.0497		113.482	46.3321	38.3469
38.0856	44.2655	36.4408		57.9088	49.6766	33.7136
41.8815	53.834	40.6379		45.9351	52.98	46.6698
	49.8006	38.0383		258.796	63.7043	46.0136
40.0751	46.7712	45.9789		114.954	82.1014	45.7195
46.503	46.9401	38.9942		61.0953	173.743	55.8105
40.4541	44.879	37.057		60.2344	47.4133	37.6902
44.2501	33.3333	49.5782		73.9721	74.6554	53.4559
41.4901	32.9162	46.5605		74.4836	109.165	50.0724
42.6999	42.7548	66.4975		71.2831	85.6713	60.3973
44.8147	38.2834	36.9501		85.9069	105.156	51.2727
51.8881	47.4757	39.4834		46.4466	64.2767	57.6812
38.4251	54.5641	57.4023		65.3259	58.2487	33.4992
50.0737	34.9316	70.9215		81.4401	106.981	38.8937
56.4209	53.9727	43.0677		72.958	101.283	45.4426
67.0878	31.9444	34.2318		69.0009	61.765	33.7937
65.5757	37.6197	36.5552		51.6223	77.4983	73.1502
50.5547	34.5853	30.7636		55.0086	64.2906	36.662
64.6002	36.5835	49.0683		72.2702	56.396	43.7506
47.243	101.138	37.1146		95.8879	105.915	40.5272
48.5	36.7862	43.0647		42.7638	58.1229	55.7099
35.0242	43.2271	35.698		70.3828	62.3671	42.5783
33.6489	30.1956	41.2707		110.932	60.5962	53.5418
	31.694	34.3883		80.2012	60.0499	59.0433
30.3869	32.5797	41.473		92.6492	67.1557	48.0424
	35.8323	37.8598		50.3044	58.9644	55.4879
40.1205	34.0804	49.6452		39.8443	54.6707	52.4142
42.5641	48.3537	30.8623		91.5446	45.2579	54.4513
32.812	39.0444	37.4472		96.6323	60.612	51.2919
40.4756	35.9681	30.8752		80.5083	64.3493	43.025
44.3302	31.6407	86.9869		51.6903	75.3634	51.2374
44.3747	46.5207	36.3787		60.6687	78.9212	41.7599
43.9544	41.6741	36.0233		87.1231	78.3999	48.7371
41.6614	34.0599	40.3256		67.0119	62.2586	47.3684
40.4957	33.8261	44.8134		110.644	56.3465	53.2069
43.4364	30.2885	36.9423		98.3503	94.3907	34.2509
44.6293	32.0578	45.9534		104.23	85.8763	33.7661
34.685	36.4639	37.986		57.7447	69.0206	38.0796
	43.99	30.4388		44.4637	48.4984	42.6146
49.2031	36.1652	85.7724		52.7499	54.0489	52.031
53.5142	39.6968	44.0507		41.9214	38.978	52.3809
56.9609	76.9436	43.5958		62.6947	63.0727	49.1326
38.133	38.3878	41.9693		58.1191	44.6052	38.073
39.2067	33.9394	33.4261		67.0142	44.69	43.5773
44.9701	48.2368	40.5755		60.3753	47.4544	36.0461
38.8376	48.1035	41.5274		99.3536	53.6664	44.2623
39.8146	89.4558	34.1736		92.0436	74.383	48.921
37.779	85.12	33.5823		93.2317	40.6513	46.6513
39.8663	46.516	36.1777		160.809	97.986	43.4655
44.6872	37.1669	45.0073		50.4244	86.1074	43.753
47.5165	37.3226	35.2159		42.5324	91.0756	40.4985
51.1806	51.55	32.5829		51.7615	73.0608	46.1026
45.7382	35.6274	41.4576		45.7348	68.3163	48.7677
52.8064	53.2531	48.2175		52.9915	77.319	47.0988
43.2031	47.185			63.213	138.622	36.035
58.1153	38.1622			38.3149	102.078	30.1532
59.3821	48.5753			47.3427	101.161	35.4435
37.6038	58.7458			63.2315	87.5271	48.124
37.5726	61.9877			34.1873	72.5786	42.6737
51.4965	54.1842			65.2629	102.722	38.7585
41.1279	46.4661			52.7474	73.061	45.5243
52.4599	52.027			51.8832	107.347	42.4861
40.0491	45.7561			40.1417	62.4545	36.2221
43.319	48.7211			49.5614	74.7092	36.0098
61.1846	51.9865			53.5828	126.204	32.5826
65.4651	41.0339			53.1094	79.1997	37.4837
52.8787	44.1931			49.8827	64.6749	37.1221
61.543	41.0784			41.8873	98.6264	47.4209
45.3526	51.7117			51.7194	104.849	32.1601
60.7621	45.1629			60.4823	81.7614	31.5556
51.9076	36.513			56.2002	90.453	50.9618
48.8757	66.5853			44.8985	84.427	30.3317
46.8646	49.0127			46.163	47.9304	53.8916
52.4559	31.1166			33.7572	86.5932	40.1087
44.8511	44.5665			31.7295	111.092	51.1667
41.9647	43.4398			30.6285	50.1786	63.2706
54.0913	43.8268			63.385	78.597	62.5355
33.7763	44.8961			36.9244	51.898	82.6566
60.4408	52.4392			51.9621	51.4752	127.385
50.5752	44.6841			55.3587	38.9369	136.035
31.4053	34.6919			42.9457	64.5863	127.653
	40.7115			33.967	54.4153	75.8049
47.4346	49.3477			32.1063	33.0907	59.1667
45.4196	52.6089			42.3541	43.868	82.4059
34.6399	39.8124			46.8402	43.5674	65.7475
56.1874	50.7463			47.0298	43.9801	63.3991
35.3076	33.5799			49.4146	36.3591	57.8938
46.1343	42.8511			46.0059	41.7335	52.0627
50.9351	34.6613			34.5072	43.5809	46.3324
43.901	30.2645			58.9675	60.2067	47.1343
39.6	37.425			75.121	39.0761	51.7895
48.1979	32.3308			46.2391	47.1468	64.3405
65.4417	33.5266			42.4871	30.1721	104.229
51.8981	37.6103			42.7547	41.1807	73.869
51.1514	38.0715			43.5669	45.7358	147.906
38.2972	42.1312			37.8145	40.6372	83.0787
39.9919	42.7923			86.4746	38.0213	56.8627
51.7709	30.7331			73.878	39.0797	98.1063
54.2478	31.0855			53.6386	44.5265	93.3127
52.2924	37.616			46.0524	45.2656	84.4347
58.1662	37.1011			46.0864	37.4614	47.3286
62.6947	51.1407			44.3179	48.9927	75.8946
65.8196	35.2479			34.9336	37.8999	108.892
58.4532	36.2229			54.8788	31.8297	96.4912
57.1407	35.7889			43.6264	50.8555	75.95
71.0381				48.4661	36.5051	98.0399
47.8904	30.6301			31.1809	42.897	70.5371
35.9535	37.5869			39.0838	41.0918	39.3178
50.996	30.8069			37.6639	41.5573	43.7866
60.2006				44.3545	76.8902	32.6714
57.6841				47.6203	58.5738	53.6703
51.0769				82.8363	49.3976	64.9904
50.264				30.8964	38.862	47.351
48.3129				37.2994	62.9747	71.85
41.8056				45.7377	49.502	50.218
61.095				30.4161	51.9684	48.9636
62.5457				45.8922	51.0922	56.0206
61.4918				33.2023	49.8162	76.4771
54.7028				30.372	78.8246	44.6727
50.4582				37.7759	70.061	53.3333
72.3733				34.779	47.618	53.8867
38.9547					57.8667	54.587
56.8822					50.9377	121.793
43.5944					47.9013	66.722
40.2691					61.6062	81.3566
65.5027					49.8167	53.9213
56.2815					34.0739	56.5515
38.7652					39.8107	51.7373
49.8112					96.5381	39.8384
54.1174					52.2645	49.3449
65.8949					30.1409	55.2888
54.9082					76.4781	60.9602
54.6301					56.4606	41.4452
87.5737					73.291	45.2431
50.1019					77.3292	55.4161
44.6357					69.4937	31.4457
53.509					53.4908	54.0407
41.5398					51.5988	47.2363
76.2924					62.8571	44.4651
					66.9201	52.2993
					53.5333	34.692
					36.6313	33.8761
					54.1094	32.5232
					50.3719	35.6322
					51.4752	43.078
					38.9369	45.4545
					64.5863	44.2196
					54.4153	42.1009
					33.0907	34.5989
					43.868	30.1961
					43.5674	42.2553
					43.9801	39.4457
					36.3591	40.962
					41.7335	41.0348
					43.5809	37.4579
					60.2067	43.7627
					39.0761	44.6328
					47.1468	34.6856
					30.1721	37.0245
					41.1807	34.1801
					45.7358	36.874
					40.6372	47.5158
					38.0213	39.521
					39.0797	45.5348
					44.5265	36.6903
					45.2656	40.6996
					37.4614	35.927
					48.9927	31.9228
					37.8999	31.6359
					31.8297	33.3333
					50.8555	38.8745
					36.5051	41.8728
					42.897	61.0319
					41.0918	31.4034
					41.5573	34.8369
					76.8902	37.9127
					58.5738	37.758
					49.3976	37.7708
					38.862	38.3987
					62.9747	31.3626
					49.502	40.5199
					51.9684	33.1218
					51.0922	43.2435
					49.8162	44.8643
					78.8246	54.0677
					70.061	66.0437
					47.618	42.9201
					57.8667	50.4928
					50.9377	54.8017
					47.9013	51.3863
					61.6062	50.8355
					49.8167	62.0342
					34.0739	74.2715
					39.8107	58.7253
					96.5381	67.4745
					52.2645	74.3293
					30.1409	36.5941
					76.4781	39.3756
					56.4606	49.3681
					73.291	60.8906
					77.3292	64.8065
					69.4937	73.859
					53.4908	76.0275
					51.5988	96.8677
					62.8571	83.0631
					66.9201	59.3732
					53.5333	63.9672
					36.6313	41.5915
					54.1094	59.7823
					50.3719	79.4884
					65.0386	91.5586
					60.6307	123.308
					55.8853	90.3147
					51.2438	69.1158
					63.5128	80.3894
					60.3879	90.1771
					46.2259	86.2164
					71.4994	98.7867
					73.9553	39.1841
					53.5268	46.2911
					50.8428	38.3013
					61.0669	64.8459
					50.9166	54.2558
					52.3727	58.1991
					46.4389	58.6813
					31.5644	59.7909
60.7625					59.5838	55.0437
37.6978					57.795	38.079
38.5583					33.5286	56.2039
40.7278					49.5015	62.7907
46.688					42.2015	44.729
38.8109					43.0662	36.0258
43.9742					50.2379	49.4631
					43.0999	41.6687
					44.5743	38.995
41.9201					42.9856	53.8332
48.5773					33.7818	40.3114
					72.5341	47.8343
38.1568					37.9554	47.3995
39.1272					48.242	58.927
47.3304					38.8056	54.8955
57.3303					48.1154	50.3463
50.2172					53.9826	55.7399
37.4851					41.3566	42.6946
41.0809					39.7929	41.0572
52.3994					49.1273	52.0522
32.1496					72.0267	63.5801
53.405					37.7556	51.8477
43.0297					48.1413	50.0647
31.701					49.8406	54.7595
49.5791					63.8588	52.1025
39.7512					53.2439	52.6921
34.1473					55.3194	34.6203
41.6244					40.444	38.8306
35.0388					69.0227
36.4603					46.8487
					38.7413
					61.5781
32.228					36.0501
40.7022					82.9981
45.1324					66.5769
33.5526					71.2823
33.2167					49.7705
33.0913
31.8771
37.0201
40.7109
33.0504
30.0015
32.564
30.2972
33.3053
33.0846
36.8287
31.8078
38.6155
46.2038
32.9673
32.9281
34.9243
30.5953
35.5501
31.7735
45.9978
33.1704
35.8522
51.5361
59.8178
31.4842
43.8292
39.7416
36.5357
48.1985
38.4892
43.4308
35.9361
50.2902
30.7711
35.3135
32.4944
32.7553
37.7039
35.207
38.3997
79.8029
31.914
30.4524
33.9051
36.8371
32.8659
33.984
32.1598
31.3542
37.4043
31.1333
34.5248
31.5162
30.5877
33.123
31.9085
30.7813
33.7656
37.4511
32.9006
35.9187
35.0676
34.5007
32.1829
30.063
41.3862
38.4394
51.7799
31.1568
31.0115
40.9595
37.7054
39.7027
38.3119
37.5767
31.8724
37.9115
38.5432
45.7995
36.3231
43.9673
38.4114
40.5275
32.8233
32.1932
30.9885
48.3027
31.0345
41.5379
44.5091
34.2835
43.6275
59.9475
43.6326
55.4168
33.3333
41.0611
35.7185
45.8243
30.9246
37.3459
51.2527
38.4649
51.842
63.1089
53.286
50.3687
52.0714
33.5616
35.607
44.9078
52.8327
58.0373
43.2983
46.8249
47.5768
38.0303
37.2296
36.7267
34.7706
38.1907
44.1441
45.7523
46.3151
40.8818
44.1655
49.8811
35.2283
31.9623
53.8181
47.1541
56.9432
53.141
36.1722
41.8221
55.6809
45.5799
34.4768
48.53
33.467
32.2723
33.0903
36.8421
38.2051
35.6818
37.9256
48.4989
31.5267
35.6847
35.5714
34.0441
45.6033
40.9127
63.6002
30.6488
34.1436
50.4181
44.4638
56.3619
48.3946
59.6968
46.8708
46.6977
33.3719
45.7918
62.524
69.3135
30.46
49.3629
47.753
67.326
71.5747
45.2333
49.5992
142.098
95.8006
55.2995
67.1827
84.4514
55.8211
45.941
35.0482
41.1807
52.0167
35.687
36.5765
30.5542
40.0861
36.9233
30.4911
46.4195
40.5981
49.1555
33.1173
64.2689
58.7488
64.9775
58.8789
72.994
68.043
62.606
60.7362
66.8648
71.0549
30.4435
47.2554
70.7786
63.1008
43.544
42.1934
30.9745
34.4468
34.7136
57.5185
50.0911
35.3975
34.0058
41.0083
51.7927
40.5622
49.1675
52.4225
42.5802
33.8365
38.965
30.5232
33.9713
39.6583
38.5876
46.9066
37.4286
47.0929
61.2143
44.4377
48.4945
38.2607
49.0236
53.1608
45.3683
81.3119
61.4143
62.1699
41.1318
57.0559
46.1538
51.2623
49.9553
79.2176
46.1261
44.4349
50.3328
56.4349
67.0747
41.2005
74.2879
68.0241
39.5418
55.2685
100.629
64.3658
43.7558
36.5681
51.7252
54.0913
55.5427
33.4725
57.7591
68.8914
62.2344
52.5551
61.1355
38.4792
41.2406
73.7808
41.1854
54.0856
42.362
58.5611
53.6847
76.4565
69.3012
63.2327
65.1613
63.4121
45.4545
83.2066
81.1976
52.4835
35.941
49.4199
49.6501
61.1713
34.9585
59.8625
44.9258
56.5669
37.2785
47.7094
65.8505
63.937
52.8068
49.2493
30.6415
50.1733
38.9213
40.8724
72.8756
50.6651
51.4376
55.3603
42.2438
48.3308
62.3159
39.6401
40.0112
45.2889
76.393
75.5629
54.066
50.9896
47.4924
52.6442
34.418
50.9246
53.3917
58.4481
59.4421
50.8433
57.254
56.553
47.8601
56.0944
42.7196
60.088
40.9583
38.7291
30.2359
42.4483
60.5785
112.944
54.6284
50.1173
47.0772
44.8936
35.1549
37.7578
42.1369
48.5507
51.9275
42.6858
55.2274
83.279
53.5219
48.5347
48.804
55.9551
64.2146
65.4785
69.9761
100.264
69.4378
44.6098
46.6899
40.6352
73.6451
45.3712
40.7535
42.1614
30.3663
38.5862
35.6518
38.4068
30.6482
53.1712
30.07
31.8732
39.5492
55.8296
38.0074
39.4803
36.5984
67.0349
48.4412
117.382
96.1629
70.7777
44.6591
74.1275
49.0722
41.1129
70.5363
47.3218
36.8576
56.918
36.3012
36.2075
42.626
50
46.1267
30.4094
31.2144
40.7407
34.5458
66.2054
63.0088
61.552
78.1201
62.641
95.6809
95.5494
60.6323
70.0626
30.3724
90.1767
86.0894
131.2
61.1713
77.3589
71.2117
37.2605
65.9447
85.4668
47.6632
62.6483
51.4198
40.3794
64.3293
72.4868
63.2259
60.1508
47.8717
83.0997
67.4061
51.5356
60.7913
72.5339
71.6865
76.8959
60.5288
71.3299
48.3033
92.1778
80.3011
41.4475
59.389
53.1142
77.5086
79.589
55.5331
82.9308
122.325
61.7004
34.2153
114.65
101.183
50.1657
73.4022
80.9261
56.5055
58.1326
67.7174
83.2673
41.9309
69.5864
78.9828
72.0874
48.1482
63.3333
92.2678
74.6421
55.5121
56.6003
57.3984
45.1587
31.3029
80.4933
49.4186
31.07
37.4667
49.0294
56.5115
50.1835
32.7213
46.6326
47.0497
62.1381
56.3247
79.344
52.5412
40.8865
40.1737
31.4347
30.7463
62.6245
58.0856
39.1061
37.5365
55.457
38.6172
41.596
46.3415
37.2364
33.0869
38.2693
63.2169
64.2058
55.3561
43.6381
62.6335
64.2933
44.3802
47.1236
55.645
46.6124
33.46
67.5511
63.8495
61.3492
73.1584
66.4474
54.4056
75.8397
57.3438
68.3172
73.5243
80.0271
60.807
57.6642
41.0636
62.4939
47.6703
69.9541
40.4541
60.8338
39.5428
43.1502
77.9906
57.5947
69.6106
58.6292
70.1271
86.8952
64.7641
54.0813
65.2379
79.1187
35.6342
60.1059
57.6174
67.802
38.3356
42.452
56.909
57.4372
50.1388
41.5318
70.7016
60.289
45.003
75.1107
47.8048
69.0309
38.3732
56.1613
54.939
64.4686
53.2475
60.7891
34.521
68.851
59.2621
51.0405
62.3913
39.7607
50.4773
56.6852
59.268
83.2599
65.8179
32.6843
78.15
61.668
74.9954
69.9022
72.2009
58.2274
57.1504
84.5134
101.129
80.7455
78.3321
76.3571
66.4313
63.6291
64.7704
65.5455
50.6003
55.8705
56.9733
67.2242
52.1674
43.6684
42.0712
72.8335
39.3631
42.2302
40.6957
38.2222
58.5445
68.2645
47.1762
49.523
58.0832
54.6099
66.6667
53.7447
61.665
57.1781
54.642
85.4473
55.4779
55.8419
56.2941
50.2794
73.213
50.7246
47.2606
55.0988
42.6697
39.5565
62.2222
44.8069
59.1814
40.7146
45.475
52.1281
43.8921
55.0139
57.5031
65.7393
50.3695
41.1114
51.2248
59.6168
57.3445
37.1404
34.9764
42.5437
30.0465
39.0774
32.4552
53.1293
47.6612
49.5183
55.7451
50.3513
32.7671
40.156
38.0569
45.5786
43.7176
38.4397
42.7662
43.494
38.4732
31.7039
43.8344
40.443
44.1118
46.7668
55.021
32.6221
43.5897
50.7284
80.1754
48.8845
49.8748
53.3296
42.9349
71.5541
51.0185
93.8303
46.9738
65.421
41.7802
69.7462
31.5203
54.5684
48.7805
55.2012
75.8597
72.4015
47.1182
55.7066
55.0856
64.3106
48.7478
67.1733
39.0949
73.9727
62.0198
56.3748
63.5144
82.8962
64.8985
52.3697
62.776
73.0789
57.435
54.0478
67.826
84.0631
57.8218
58.8996
67.1356
85.8657
89.8294
81.8565
70.4298
79.1338
56.9497
37.241
69.1294
86.2205
59.685
62.1544
103.814
83.5831
61.9483
55.3841
106.79
39.3195
53.2136
48.3359
49.2975
55.3339
65.3031
55.8855
49.0094
63.4478
74.4813
58.2997
45.7912
49.9664
61.9739
50.8424
80.1383
34.9903
49.6191
55.2159
47.3708
63.7543
80.1754
48.8845
49.8748
53.3296
42.9349
71.5541
51.0185
93.8303
46.9738
65.421
41.7802
69.7462
31.5203
54.5684
48.7805
55.2012
75.8597
72.4015
47.1182
55.7066
55.0856
64.3106
48.7478
67.1733
39.0949
73.9727
62.0198
56.3748
63.5144
82.8962
64.8985
52.3697
62.776
73.0789
57.435
54.0478
67.826
84.0631
57.8218
58.8996
67.1356
85.8657
89.8294
81.8565
70.4298
79.1338
56.9497
37.241
69.1294
86.2205
59.685
62.1544
103.814
83.5831
61.9483
55.3841
106.79
39.3195
53.2136
48.3359
49.2975
55.3339
65.3031
55.8855
49.0094
63.4478
74.4813
58.2997
45.7912
49.9664
61.9739
50.8424
80.1383
34.9903
49.6191
55.2159
47.3708
63.7543
100.52
110.796
67.3728
108.263
85.7187
60.9049
92.4349
76.1395
65.1373
71.9916
73.2524
78.0897
87.8936
106.554
70.0256
81.0818
60.3901
43.4723
90.8092
111.924
78.9226
79.4053
100.61
58.4385
52.0231
91.384
63.4
71.3895
54.6459
75.5488
65.0092
81.2223
73.6259
83.9646
88.2496
53.2886
62.6016
59.1057
71.1572
44.7536
89.316
55.6229
53.4916
85.0926
64.8559
69.8682
65.6061
50.7188
32.7576
74.1451
63.3718
54.8801
67.6191
35.6832
45.2043
66.1096
49.3525
45.6354
51.4378
63.5181
60.5205
90.2479
64.0549
61.5635
92.9773
60.8503
115.203
75.0972
57.2749
78.4812
86.69
70.21
57.7313
79.8561
83.958
73.1177
61.4548
65.5841
55.7689
45.0935
51.2757
57.0448
40.8445
64.6312
37.807
51.0173
55.4927
49.4795
102.566
44.2964
44.0418
50.6676
66.4612
56.3218
63.2363
64.4154
57.8424
93.6489
96.606
93.908
67.7925
65.7155
45.5376
67.0548
58.7635
59.3296
62.2934
100.048
46.2596
42.3767
44.473
49.1565
42.9792
44.5028
42.9313
32.2705
31.482
40.5151
47.0733
51.9884
69.1533
31.1234
72.4796
34.8837
49.1555
38.6473
40.2172
60.4226
57.916
50.5487
39.5911
44.7765
39.8018
41.7954
55.8122
67.8646
48.8394
68.6845
64.0961
45.5766
76.3153
45.01
45.2416
36.6041
57.7626
39.2282
53.5462
52.0204
42.8704
43.8586
59.3861
61.2969
52.6238
54.0673
43.4107
50.6376
53.7016
69.1119
57.544
61.4053
55.4089
41.9558
45.2613
43.0263
59.9658
67.9857
37.1515
69.697
63.5331
56.6686
72.0241
80.8436
59.3856
54.8914
51.615
93.0134
97.9834
60.3709
77.8219
70.7708
52.2391
58.5069
56.5502
42.7595
63.0241
48.9102
32.9317
47.1616
33.8207
43.8181
62.2744
58.7037
49.9121
56.926
53.4295
67.9198
61.0878
54.2032
41.1445
62.5175
51.2108
45.2528
67.0249
33.9559
36.253
46.6028
47.4896
52.0803
58.4075
62.4923
61.4826
104.596
48.9971
61.9872
38.6272
42.2184
67.2285
53.3466
55.3544
62.6326
43.6652
53.6142
56.2664
58.3546
61.958
59.9511
53.0452
37.2981
63.693
80.847
117.697
78.6471
57.8415
83.3529
113.709
72.4551
72.7332
48.1738
76.1212
54.8663
95.3388
78.024
60.3424
86.5435
72.4329
99.603
75.3376
71.3042
66.5911
69.3544
66.9157
62.6055
143.374
76.6312
44.5277
142.922
113.86
88.7208
102.098
95.2273
95.7025
118.199
65.6566
104.276
152.223
92.6424
64.1096
43.078
80.6557
51.0709
67.33
93.9105
74.9441
47.1452
88.7018
107.269
113.258
72.8791
84.6217
98.2154
77.6667
107.439
64.8977
139.064
88.8889
101.334
140.79
117.092
67.6929
56.4565
62.4809
49.0033
42.9994
71.5047
59.4983
31.2471
30.9036
41.108
81.4391
108.509
66.8838
44.9652
31.723
42.9635
65.8944
44.1168
61.2383
44.6437
45.1442
34.2757
37.5325
31.8983
36.4727
28.0495
37.5807
80.345
84.3028
87.3101
58.3459
51.3442
33.4266
33.7474
42.3452
49.2967
35.7531
38.0305
36.5774
39.9661
48.7533
39.3803
30.3786
51.2516
46.6106
40.9503
33.9521
31.7304
47.3891
46.3914
43.9551
31.3514
53.5786
37.6844
34.1784
42.2893
45.0178
32.4601
34.9846
36.5407
43.6342
41.8474
32.901
51.865
36.6997
50.8058
60.9969
99.2537
76.1642
138.924
61.9023
94.7893
44.8985
108.911
138.515
107.416
139.564
121.648
142.031
107.078
67.5012
58.2169
128.355
90.6418
122.287
66.3933
148.066
82.6433
110.607
110.275
60.9412
83.5936
123.128
94.3635
65.0012
63.4797
90.9465
127.497
115.469
87.2006
123.61
81.4197
59.6965
83.4609
59.4082
73.7316
72.5062
77.705
67.3399
87.9028
87.0351
88.6271
85.4427
59.388
80.3015
88.0936
61.8531
70.8913
79.2278
66.1179
61.4772
66.1739
70.1348
55.9305
36.8865
54.1657
105.068
77.1802
91.9851
108.999
125.77
90.5657
142.572
133.359
90.5239
144.259
138.307

## Sheet: Fig 2D
control	20 μM EGTA + 0 Ca2+	20 μM EGTA + 0 Ca2+/NMDG		20 μM 5J4	TRPA1 KO	TRPC5 KO
19.9414	19.9414	17.4766		22.0809	22.1075	17.6617
21.6549		17.6932		21.5183	22.0809	21.9923
21.9923	18.6536	21.8704		21.2727	22.2273	21.8704
22.0708	17.2926	22.9211		22.0809	22.1247	22.1247
20.8124	19.3306	19.5233		22.0232	22.0809	22.1075
22.4953	20.4285	22.1231		22.0708	17.2418	18.7596
22.0708	22.0232	21.8704		22.2273	22.1247	22.1231
21.9923	19.0134	21.8704		22.1247	21.4878	22.5421
18.1606	17.299			21.4878	22.0232	22.3137
21.4878	21.6549	19.3306		22.4953	22.2273	22.5421
21.8704	17.2418	22.0708		21.5183	21.8704	22.2273
22.0708	21.1824			22.6356	22.1247	22.4765
21.4878	17.6617	17.2418		18.6536	22.2273	17.2418
22.6152	17.5073			22.0232	19.2166	17.5721
21.8704	21.1824	17.4766		22.5421	22.1231	22.3137
21.4878	17.6617			22.0232	21.5183	22.4765
21.4878	17.5073			17.671	17.9841	21.8704
21.5183		17.5073		22.1231	21.9923	22.1231
21.1824	22.1075	17.4766		21.4878	21.1824	22.1075
21.9923	20.8124			21.5183	21.5183	22.2273
21.9923	21.5183	17.4766		22.0809	22.2273	22.0232
20.8124	20.3648	17.6932		22.3137	22.0708	19.0134
20.6949	21.9923			22.4765	22.0708	17.299
18.6536	17.4766	19.5233		22.1231	22.0708	22.4953
21.4878	18.1585	17.4766		22.1231	21.9923	17.2418
17.5015	21.8704	19.9414		21.2727	22.0809	17.2418
21.9923	20.1807	19.8513		17.5073	21.9923	22.1231
22.0708	21.8704	22.0708		18.1585	22.0809	21.8704
21.2727	22.0232	19.739		19.0134	22.2273	18.6536
21.4878	22.0232	21.6549		18.1606	22.1247	22.4765
22.0232	21.1824			22.1231	22.0232	17.6617
22.4953	20.8124				21.4878	17.2418
21.5183	21.5183	21.8704		20.8124	21.9923	22.1231
22.0809	17.4766	17.4766		22.1075	21.9923	21.6549
21.8704	22.1231	20.8124		21.0057	21.5183	22.1247
22.1247	21.4878			22.3137	21.9923	17.2418
18.7596	21.6549			20.6949	22.0232	21.4878
21.4878	20.3648			22.9211	22.1075	17.671
	21.5183			21.4878	22.0232	22.1247
	17.2926			22.1075	22.6356	22.3137
	22.1247			22.1075	22.2273	22.3137
	19.8513			20.6949	22.0708	22.4765
				22.0809	22.1075	22.4765
	18.6536			22.1075	22.1247	22.1231
				21.6549	22.0809	22.3137
				17.6932	22.1247	21.9923
	17.671			18.1585	22.4953	22.5421
	18.5479	23.5298		22.3137	22.2273	22.2273
21.0057		22.9211		22.0809	22.1247	22.4953
18.5479	21.6549	21.8704		21.5183	22.1247	22.1231
18.3533				19.5233	22.0809	22.1247
	17.2926			17.671	22.2273	22.1247
17.2418	21.1824			22.0232	22.1075	22.1231
17.2926		21.8704		21.5183	22.0708	22.0232
17.2926	21.1824	18.6536		21.5183	22.2273	21.6549
	19.5233			20.1807	22.4953	22.4953
20.6949	21.5183	21.8704		19.0134	22.0708	22.5421
19.8513				21.8704	22.2273	17.2926
20.6949				17.671	22.6356	17.2418
19.5233				22.4953	22.3137	22.6356
20.8124	19.8513			18.1585	22.5421	22.5421
20.6949	18.3533			20.4285	21.1824	21.2727
19.5233				19.2166	22.1231	22.1075
18.1585	19.739			22.0809	17.9841	19.0134
20.6949				21.5183	21.5183	21.2727
21.4878	17.6617			22.6022	22.0708	17.6989
20.6949	19.0134				22.1247	18.1606
21.0057	17.5015				17.9841	22.0232
20.6949	19.739			19.9414	22.3137	22.1075
21.5183	17.6989			22.5421	22.5421	22.4765
21.9923				19.0134	22.6022	22.4953
20.6949	21.4878			17.6619	17.9841	22.0809
21.8704	21.5183			17.5073	22.0232	17.2926
21.2727				19.8513	22.1247	17.4766
20.6949				19.0134	22.0809	17.2418
21.8704	18.6536			22.0708	18.5479	17.2418
21.1824				18.1585	22.1075	17.299
20.1807	17.2418			17.9841		22.1247
19.5233				21.0057	20.8124	17.6617
19.3306	17.4766			22.6356	20.6949	21.8704
20.6949	20.1807			17.671	18.3533	17.2926
	19.8513			22.0232	22.0232	22.4765
21.5183				22.0809	20.1807	22.6022
21.6549				21.8704	19.5233	22.1231
21.6549					22.4765	20.4285
19.9414				18.3533	20.6949	20.6949
21.8704				18.1606	21.6549	22.0232
21.1824	19.5233			21.5183	21.0057	22.0708
21.8704	21.4878			21.1824	17.9841	22.0708
		17.5073		17.6619	22.4765	22.0809
21.6549		20.1807		21.1824	22.1075	22.1231
21.1824				22.2273	22.1231	17.5073
19.8513	18.6536	19.3306		19.3306	21.1824	17.2926
21.5183		17.4766		21.1824	21.9923	22.2273
21.5183	20.4285			20.8124	21.5183	17.2418
20.4285				21.4878	21.9923	18.1606
21.4878		21.4878		18.3533	22.2273	17.4766
	20.6949	17.5721		22.4953	22.1247	17.5015
18.1606	20.1807	17.299		21.6549	22.1231	22.1231
21.2727	17.2418			22.3137	17.6932	22.2273
22.0232				17.2926	22.1231	22.0708
17.5721		22.4953		22.1231	22.2273	21.2727
		17.6617		18.1585	19.9414
17.5015	19.5233			17.299	22.1075	21.9923
21.1824				19.5233	22.3137	17.6989
20.8124		21.5183		22.0232	22.3137	22.0232
21.6549		17.5015		22.6022	22.3137	18.1606
21.6549	20.6949			17.2926	17.9841	17.5721
17.2418	21.2727			21.0057	22.0809	22.0809
22.3137	21.5183			17.6619	18.1606	17.2418
22.0708	20.6949			21.5183	22.2273	22.1247
19.9414				22.1231	17.671	22.3137
21.8704	18.6536			17.2926	18.1606	22.1247
20.1807				19.2166	17.9841	21.5183
20.3648	21.4878			17.2926	22.2273	22.4953
22.3137		20.1807		21.1824	21.8704	17.6932
22.0708		18.5479		21.2727	22.0232	21.9923
21.9923				21.4878	23.6903	20.3648
21.2727	17.2926	17.6932		22.1075	22.1075	17.671
18.1606	17.6619	23.6903		21.4878	22.4953	22.2273
19.8513				20.4285	22.3137	18.5479
22.0708	17.6619			19.8513	22.1231	21.9923
17.2418	19.8513			22.4953	22.6356
20.3648	22.1247	20.1807		21.5183	21.5183	17.4766
19.3306	20.6949			17.671	17.6619	17.6619
21.6549	21.8704			22.6022	22.3137	22.2273
21.4878	22.3137			18.6536	22.2273	22.0809
20.1807	22.2273			22.0708	21.9923	17.671
21.2727	21.1824			17.2926	20.4285	17.2926
	21.5183			21.5183	19.9414	17.6932
22.0232	22.0809			19.8513	22.2273	17.5721
19.0134	22.0708			17.2926	22.2273	17.299
17.671	17.6932			20.3648	22.4953	22.3137
22.0708	22.0809			21.4878	22.0809	17.6989
22.1231	21.5183			19.5233	22.0708	22.0809
22.0809	21.5183			20.4285	22.4953
17.5073	22.1075			21.1824	22.0809	21.8704
21.8704	17.6932			21.4878	22.0708	22.1075
21.6549	21.0057			19.739	22.1075	22.1231
	21.8704			22.1231	21.6549	17.2418
	22.6356			22.1231	22.1231	17.2418
21.8704	20.4285			22.0232	22.6022	20.1807
21.5183	22.0708			20.8124	22.4953	20.3648
22.1231	23.6903	17.6932		17.6619	22.2273	20.3648
22.1231	21.2727			19.9414	22.6022	21.9923
20.8124	21.9923	17.6619		17.2926	22.6022	22.1247
22.0809	22.3137			22.0708	23.6903	22.1247
	22.4953			20.6949	22.4953	22.0809
22.1231	17.4766			19.2166	22.3137	19.739
22.0708	21.8704			20.4285	22.2273	17.299
22.3137	17.6932			20.8124	22.0708	21.8704
22.1075	17.5073	21.9923		18.6536	21.6549	22.0809
22.1231		18.1585		22.4953	22.1075	17.5721
19.2166		17.6932		21.1824	22.3137	21.6549
				20.6949	22.5421	20.8124
21.9923	21.2727			21.9923	22.1075	22.0708
17.4766	18.6536			20.4285	22.1231	17.671
21.5183	21.0057	17.2418		22.0809	17.2926	21.9923
21.5183	18.6536			17.5721	22.3137	22.1075
21.0057	22.1247			20.3648	22.0809	22.0708
18.5479	23.6903	21.5183		19.8513	22.1247	22.0809
18.7596	18.1585			21.9923	22.4765	21.8704
21.5183	22.0232	21.9923		21.9923	22.5421	17.6619
	21.1824	22.0708		20.6949	22.3137	21.4878
20.3648	22.0708			21.5183	22.4953	17.299
17.2926	22.2273			20.8124	23.6903	21.6549
	22.0809			22.4953	22.6022	22.0708
20.6949	22.3137			19.8513	17.299	21.4878
21.8704	22.6022			20.8124	23.6903	20.1807
19.739	21.6549			21.8704	22.4953	22.0809
18.5479	18.1606			21.8704	17.2926	21.5183
19.5233	21.2727			22.0809	22.4953	18.1606
21.4878	22.1231	18.7596		20.6949	22.4765	21.4878
19.3306	17.5073			17.6932	22.4765	22.0708
18.6536	21.6549			20.8124	22.0708	21.1824
	17.6617			21.8704	22.1231	19.0134
18.1585	21.5183			19.3306	22.6356	21.4878
		18.1606		21.8704	22.5421	20.8124
17.5721				19.739	22.4765	18.1585
17.6619	21.2727			19.0134	22.4765	17.299
21.0057	21.8704			19.9414	22.2273
21.0057	22.0708			21.6549	22.2273	17.671
19.8513	22.0232			18.7596	22.4953	21.1824
20.1807	17.6932			20.3648	22.1247	21.6549
21.2727	21.5183			18.3533	21.6549	19.2166
20.6949	22.1231			17.299	22.1247	22.1231
20.3648	21.6549			22.3137	22.4953	17.671
19.739	21.4878			22.1247	22.0232	17.9841
18.6536	22.4765			21.9923	22.6152	18.6536
19.9414	22.0809			19.8513	22.6356	17.299
20.4285	21.4878			22.3137	19.5233	18.7596
17.4766	22.0232			18.7596	21.0057	17.5721
21.5183	22.0809			20.3648	21.5183	21.1824
17.5015	21.1824			19.2166	22.1231	22.1075
21.5183	21.4878			21.5183	22.3137	20.4285
17.299	22.4765			18.3533	17.6617	21.8704
20.1807	21.9923			22.0232	22.1231
17.6617	21.4878			23.1088	21.9923	17.2926
18.1606				19.8513	21.0057	22.1075
20.6949	22.4953			18.7596	19.8513	17.5015
19.2166		22.9211		17.9841	21.4878	17.6932
17.6932				18.3533	21.0057	20.6949
				21.6549	22.1075	22.0809
17.6989	20.6949	18.6536		22.3137	18.7596	22.1247
21.4878	19.8513			22.0232	21.0057	22.1231
21.6549	18.1606	23.5298		20.4285	22.0232	22.1247
17.5015	19.739	20.8124		20.4285	21.0057	23.1088
17.671	17.2926	19.0134		17.6617	21.0057	21.8704
22.0708	21.2727	17.6989		21.2727	21.2727	22.6356
18.1585	21.2727			19.8513	21.2727	17.2926
22.0809	19.5233	17.6617		20.1807	19.9414	22.0809
17.2418	20.8124			21.2727	19.9414	22.1247
21.0057	22.0708			17.6932	22.0708	22.3137
18.1585	22.4765			19.9414	22.0232	22.1075
	21.5183	19.739		17.6932	21.6549	22.0708
19.739	18.5479			22.1231	22.0809	17.2926
18.1585	20.6949			20.6949	21.9923	22.1247
21.0057	20.4285			22.3137	20.4285	17.2418
17.6617	21.6549			19.0134	22.1247	22.4953
18.1585	21.5183			19.3306	17.6617	22.4953
17.671	21.0057	23.5298		22.2273	21.2727	22.6356
22.0809	18.5479	22.779		21.9923	21.6549	22.2273
22.3137	18.7596			22.2273	21.2727	22.1247
	21.1824			22.2273	22.1247	22.1231
21.9923	19.8513			21.9923	22.1231	22.4953
21.4878	19.9414	23.501		20.8124	22.1075	22.5421
20.4285	21.6549	22.9578		19.5233	21.2727	22.0809
19.739	21.1824	23.501		19.9414	22.0809	22.4765
20.8124	19.5233			17.2926	21.4878	21.8704
22.0232	21.6549	22.779		22.1075	22.1231	22.4953
20.6949	19.3306	23.5298		21.0057	19.9414	22.4765
21.4878	21.1824			22.0232	22.1231	22.4765
22.0232	21.6549			17.9841	22.4765
21.0057	20.3648			17.4766	22.2273	22.1247
21.8704	21.2727			17.6932	23.3409	22.0708
	19.8513			21.1824	22.2273	19.3306
21.1824		17.6989		19.3306	22.2273	19.739
17.2926	17.6617			21.9923	21.0057	22.1075
22.0708	21.9923	17.6617		19.739	21.2727	22.1231
	22.1231	21.0057			17.2418	18.1606
20.6949	21.2727			18.1585	22.1075	22.4765
22.0708	21.8704				21.8704	22.1075
21.4878				17.2926	21.0057	22.1075
	19.5233			17.299	22.6356	22.1075
17.4766				19.3306	22.0708	17.6617
	17.6617				18.3533	22.1247
21.9923					21.8704	22.4765
17.299		22.6152			22.1231	17.2418
17.299	17.299	17.6932			22.1075	22.4953
20.3648	17.6989				22.4765	22.4765
17.2418		22.4765			22.3137	21.8704
17.2418	17.299				22.1231	22.4765
	20.6949	21.1824			20.4285	17.299
17.6619	19.8513	21.1824			21.2727	22.4765
17.6989	18.6536	17.5073			22.1075	22.1231
	18.1606	22.2273			22.1231
17.5073		22.6356			21.6549	17.2926
21.4878	21.1824	22.2273			21.2727	22.1247
21.2727		18.5479			22.0232	17.2418
17.5721		17.2926			21.6549
18.3533		17.5015			22.0809	17.5721
22.2273		22.1075			20.4285	21.8704
19.3306		21.0057			22.0809	17.671
		22.1247			22.0232	17.6989
		18.6536			20.6949	17.5073
21.5183					20.1807	21.0057
22.0232		17.5721			21.6549	22.1231
22.0232		22.1231			22.1231	19.3306
22.0708		21.6549			22.6152	20.8124
18.3533		20.6949			21.6549	22.0708
17.5073		22.1231			22.1231	17.6617
18.5479		18.6536			22.2273	20.1807
21.6549		21.9923			20.6949	17.671
22.0809		19.739			22.1231	17.4766
22.1075		22.0232			22.2273	17.299
22.1231		19.5233			20.4285	21.4878
22.1231		22.4765			20.6949	18.3533
21.4878		21.2727			21.1824	18.5479
21.6549					17.5721	18.5479
22.0708		22.6022			20.6949	19.8513
21.8704		22.9211			19.0134	20.8124
21.8704					19.0134	20.8124
22.0708					22.0708
22.0708					22.0232	20.8124
21.4878					19.2166	19.2166
22.0232		17.2926			20.4285	22.1231
22.1231		22.0708			20.6949	22.2273
21.4878		21.8704			20.1807	21.5183
20.6949		22.1075			22.2273	17.2926
21.2727		18.7596			22.0708	21.1824
18.1606		17.2926			21.0057	17.671
22.0708		21.8704			19.8513	18.6536
21.6549		18.1606			19.5233	20.6949
22.0232					21.6549	19.2166
21.2727		20.3648			20.6949	21.9923
21.5183		22.1247			21.8704	19.9414
17.2418		22.1247			22.0708	21.4878
21.1824		22.3137			21.8704	20.6949
22.0232		18.7596			22.1075	17.6619
22.0708		22.2273			22.1247	20.8124
17.6619		20.6949			21.1824	20.8124
22.0809					20.3648	19.2166
21.4878		21.6549			22.0232
22.0708		21.5183			22.1247	18.3533
19.739		19.8513			22.2273	21.0057
21.5183					22.0809	20.8124
19.739		19.5233			22.0809	21.6549
21.8704		21.9923			21.8704	19.0134
21.4878					18.1606
21.6549					21.8704
22.1231		20.3648			21.8704
22.2273		21.9923			22.0708	18.7596
21.9923		20.3648			22.0232	18.5479
22.0809		20.6949			21.0057	20.1807
17.6619		20.8124			21.8704	19.0134
20.6949		21.6549			22.0809
20.4285		21.9923			22.0708	17.5073
21.9923		21.6549			22.0232
21.9923		19.5233			22.0232	17.6617
21.6549		19.739			20.8124
21.0057		20.4285			23.3409	20.8124
19.739		17.671			22.1231	20.8124
					22.0232	17.6617
17.5015		21.2727			19.2166
17.6619		22.1247			22.1075	21.8704
		21.1824			22.0809	22.1247
18.1606		19.739			21.5183	19.3306
20.8124		17.6932			22.1247	22.1075
20.4285		19.8513			22.3137	17.6619
21.8704		17.2926			22.1075	22.1231
22.0809		18.6536			22.1075	17.6932
21.9923		21.9923			21.9923
21.8704		22.1231			21.5183	20.8124
22.1247		20.1807			22.0232	17.6619
22.4765		17.6617			21.5183	20.6949
23.6903		22.3137			17.671
22.2273					22.0232	20.8124
17.4766		19.739			17.5015	20.4285
21.2727		21.9923			21.8704	17.6617
21.5183					22.0232	21.1824
22.1231		21.0057			22.1231	21.4878
21.4878		22.3137			19.8513	22.6022
19.5233		22.3137			22.0708	22.5421
21.6549					17.6932	18.3533
21.0057					21.6549	19.3306
21.2727		20.6949			22.1231	23.1088
20.8124					17.671	22.9211
19.8513					21.9923	22.4953
20.6949		22.0809			21.6549	22.9578
21.0057		22.0708			21.8704	17.5015
21.1824		19.739			22.1075	17.4766
22.0708		20.8124			22.0232	17.2926
20.3648		18.3533			21.1824	22.779
22.0232		19.3306			22.0809	22.4765
21.5183		20.6949			22.0708	18.1585
20.3648		18.7596			22.0809	22.1247
21.1824		19.739			21.8704	22.4765
21.5183		18.7596			21.9923	20.6949
17.6989					22.0809	22.1075
21.6549		17.9841			22.0809	22.2273
20.6949		18.3533			22.0232	23.3409
19.5233		17.4766			17.671	17.4766
22.0809		22.1075			21.9923	22.5421
22.1231		17.5721			22.4953	22.1075
19.9414		17.5073			22.0708	19.5233
17.299		20.8124			20.3648	20.3648
21.8704		22.0809			22.0708	22.779
22.0809		22.1231			20.1807	17.671
20.1807		19.2166			22.6022	22.3137
21.8704		17.5073			22.0809	19.3306
21.5183		17.6932			22.1247	19.8513
21.2727		21.8704			17.6932	20.1807
21.5183						23.3409
21.0057		21.4878				17.2926
19.9414		21.5183				18.3533
20.4285		19.0134				17.5721
22.1075		20.1807				23.3409
21.2727		22.1231				21.0057
20.6949						19.2166
20.4285		21.0057				17.6932
20.8124		17.6932				18.1585
22.0809
21.4878		23.6903				17.9841
21.9923		23.3409				19.9414
22.1075						22.0232
22.0809						17.4766
21.4878		21.6549
22.0708						22.3137
22.0232		22.0809				22.779
21.9923		22.1231				17.9841
21.5183		21.2727				22.1231
20.8124		22.0232				21.8704
21.4878						22.2273
22.0232		21.4878				22.1231
22.0708						17.5015
22.0232		19.8513				19.0134
21.5183		19.739				21.4878
21.9923		23.1088				22.0809
20.6949		20.6949				22.1247
21.8704		22.2273				22.0708
21.5183		19.8513				22.1247
21.8704		18.1585				22.2273
17.4766						22.3137
21.9923						22.1247
22.0232						23.5298
17.4766						22.0809
21.8704						22.2273
20.8124						22.2273
20.6949		18.1585				21.8704
21.8704		22.1231				21.4878
22.0232		17.671				21.5183
17.4766		18.1585				22.0708
21.5183		17.5015				22.0708
21.9923		19.0134				22.2273
22.0809		17.2418				22.1247
22.2273		21.5183				22.0708
21.4878						23.6903
22.1247						22.0809
21.5183		17.299				22.2273
21.2727		21.6549				22.5421
21.6549		19.2166				21.6549
19.5233		20.4285				22.0708
22.4765						22.1247
22.2273						17.2926
22.0809						23.6903
22.8433						22.2273
22.6152		17.5015				22.3137
22.6356						22.1247
22.6356		17.671				22.4765
22.9211		23.3409				22.1247
22.3137		19.2166				22.779
20.8124		20.6949				22.1075
22.6356		22.0232				22.0232
22.8433						21.5183
22.6356						22.1247
22.5421		22.0232				22.1231
18.5479		17.6932				22.0809
22.6022		17.6619				22.0708
22.6356		20.8124				22.1231
22.2273		18.1585				21.8704
21.1824		22.1247				21.1824
20.6949		17.4766				21.8704
17.5073						22.0809
21.9923		22.2273				22.0232
22.4765		21.2727				21.8704
22.5421						17.2926
22.6022						18.1606
22.6022						22.0232
22.8433						21.8704
22.6152						19.8513
22.6356						22.1075
22.0232		21.5183				21.8704
22.6356						22.1075
22.5421		20.4285				22.0708
22.4953		21.2727				22.2273
22.4953		19.2166				22.0809
22.6356		18.1585				22.3137
22.2273		17.2418				21.9923
22.1247		20.1807				21.6549
22.4953						22.2273
22.6356						22.0809
22.4765						22.0809
22.5421						22.3137
22.4765						21.6549
22.1075						21.8704
22.2273						21.4878
22.6356						21.8704
22.4953
22.4953		20.4285
21.1824		21.5183
21.9923		23.501
20.6949		17.671
22.3137
22.5421		17.2926
22.2273		18.7596
22.0708		22.0232
20.3648		21.5183
21.9923		21.5183
22.1231		20.4285
22.4765
22.4953		21.8704
22.5421		21.4878
22.4953
22.6356		19.9414
22.4765
22.4765		17.6619
22.6356		20.4285
22.5421		18.7596
22.6022		18.7596
22.5421		19.2166
22.5421
22.6022
22.4953		17.299
22.4953		17.6989
21.9923		22.5421
21.4878		19.2166
19.8513		21.8704
20.3648		22.1231
21.9923		22.6356
21.9923
22.4765		19.3306
22.5421
19.5233
22.6356
22.3137
22.5421		20.6949
22.1247		17.2418
22.1247		22.0708
22.0232
22.6356		22.4765
22.1075		19.2166
17.2926		17.2926
19.739		19.5233
18.5479		19.0134
21.4878		21.4878
22.0809		21.2727
17.6932		20.6949
17.9841		21.9923
21.1824		21.9923
18.6536		21.8704
22.1231		21.6549
18.1585		17.2926
21.1824		22.0708
17.4766		20.3648
19.0134		20.4285
22.3137		21.2727
17.5721		22.6022
17.2418
18.1606		21.1824
22.3137		22.2273
19.2166		21.2727
22.1247		19.9414
22.1247
19.8513		22.0232
18.1606
19.0134		17.5015
22.0708		19.0134
22.1231		20.8124
22.6022		22.1075
22.779		20.1807
21.6549		19.2166
20.4285		19.2166
19.8513		21.4878
17.2418		18.1606
17.5073		19.3306
17.5721		22.9578
17.6989		22.0809
21.1824		23.501
21.0057
17.299
17.6989
17.6989
17.671
22.1247
19.8513
21.0057
21.9923
17.299
19.5233
18.1585
20.4285
22.1075
20.6949
20.1807
21.9923
17.299
20.6949
19.5233
19.9414
21.9923
19.8513
17.299
18.1606
21.9923
19.3306
19.0134
22.3137
22.4953
20.6949
18.3533
22.0708
21.9923
21.9923
18.3533
18.3533
18.6536
22.0809
20.8124
17.6932
22.4765
17.4766
17.5015
17.299
18.3533
21.8704
20.3648
22.0809
21.0057
21.5183
22.6022
22.8433
23.6903
21.9923
17.6932
21.5183
17.299
22.0708
17.2926
20.3648
19.5233
17.5015
20.4285
17.5073
21.9923
19.2166
20.6949
18.5479
18.1585
17.6617
21.2727
17.6932
21.6549
17.4766
17.6989
20.8124
21.6549
21.6549
21.8704
21.5183
21.9923
17.5015
21.1824
20.1807
17.299
21.1824
21.9923
17.9841
19.3306
17.2926
22.0708
17.299
20.3648
21.5183
19.5233
20.6949
17.2418
21.9923
22.1231
18.1606
17.2926
21.1824
21.8704
18.1585
19.0134
17.9841
21.8704
17.2418
17.6932
20.4285
22.1075
17.2418
21.9923
21.4878
17.5015
17.6932
21.9923
17.6932
17.2926
22.4765
21.1824
20.3648
17.2418
20.4285
19.8513
18.3533
22.1247
22.0232
18.3533
20.1807
17.5015
21.6549
21.9923
17.5015
17.5721
22.0809
17.5721
21.8704
22.1247
22.0708
21.9923
22.0809
19.3306
17.6932
19.3306
20.8124
21.9923
22.0809
22.0708
22.0232
22.1231
22.0809
21.9923
21.9923
20.4285
21.6549
17.6932
21.4878
22.0232
20.4285
21.6549
17.5015
22.1247
22.1075
21.6549
17.5015
22.0232
20.4285
22.1231
22.0809
21.0057
17.5721
22.0232
22.0809
19.3306
22.0232
19.8513
17.5073
19.3306
17.9841
18.1585
18.6536
17.4766
18.6536
20.3648
22.3137
17.6619
20.1807
20.6949
19.5233
20.1807
21.5183
21.9923
22.1247
21.2727
20.6949
22.1075
22.1231
22.1075
22.0232
22.0708
22.0232
22.0232
19.3306
22.0708
22.0809
22.1247
22.0708
17.6989
22.0809
21.8704
22.6356
22.4953
22.0809
22.0708
23.3409
22.3137
21.1824
22.1231
22.1075
23.501
21.8704
21.9923
17.5721
17.671
19.0134
18.1606
21.9923
17.2926
21.6549
20.3648
21.0057
17.6989
17.5015
21.9923
21.8704
20.1807
19.739
22.1247
22.0809
22.1075
22.1231
22.3137
22.1247
22.1231
22.1247
22.3137
22.2273
21.5183
22.1075
22.4765
22.1247
22.0232
21.6549
21.0057
17.2418
18.5479
20.8124
22.1075
22.1075
19.9414
17.2418
19.9414
20.6949
17.4766
21.1824
21.0057
17.299
17.2418
20.6949
17.2418
17.2418
20.6949
20.6949
17.299
20.4285
19.739
21.9923
22.0708
21.9923
22.0809
22.5421
17.6989
22.0232
21.9923
21.9923
22.0809
22.0232
22.0809
21.8704
22.0708
21.8704
21.9923
22.0708
22.3137
22.0232
21.9923
22.0809
22.4765
22.0708
22.0809
22.0232
22.6022
22.0232
21.8704
21.5183
22.4953
22.1231
21.6549
21.8704
22.0809
22.1231
22.3137
17.9841
21.9923
22.1075
21.9923
17.6619
17.5073
20.1807
17.299
17.2418
22.3137
22.0708
22.2273
21.4878
21.9923
22.0708
22.3137
22.1075
22.0809
22.4953
22.1075
22.0708
22.2273
22.3137
21.6549
17.5015
22.6022
22.0708
21.8704
17.5073
22.0809
22.0708
22.3137
17.4766
22.1247
21.8704
22.0708
20.3648
22.0708
22.1247
22.2273
21.9923
21.8704
21.2727
22.1231
17.5073
21.8704
22.6356
22.0232
22.0232
22.1075
17.2926
21.9923
22.0809
21.4878
21.4878
21.4878
22.4765
21.9923
22.1075
21.4878
22.1247
22.1231
17.2926
17.6619
22.0232
22.0809
22.0708
22.0232
22.0809
22.1075
22.0809
22.1247
21.4878
21.1824
19.739
20.3648
17.5073
20.4285
18.7596
22.0232
22.0708
22.1075
22.0232
21.0057
19.0134
18.1585
21.5183
22.1231
22.1075
21.4878
21.9923
22.2273
23.1088
22.2273
22.1247
18.3533
22.0809
22.3137
22.4953
22.2273
22.6022
17.4766
17.4766
18.7596
21.9923
22.2273
22.0232
17.4766
21.8704
21.4878
17.9841
21.9923
20.8124
21.9923
21.9923
21.1824
17.2926
18.1606
22.0708
20.4285
22.0809
19.3306
17.4766
21.1824
21.6549
22.0708
22.6022
22.0232
22.0809
17.4766
22.1075
21.2727
22.0708
22.4765
21.2727
17.9841
22.0708
21.0057
17.6989
21.4878
21.9923
19.9414
17.5073
17.671
20.1807
19.5233
20.3648
22.1247
21.9923
22.0232
17.4766
22.0809
22.0809
21.8704
22.0708
21.4878
21.5183
21.4878
21.2727
20.1807
22.0232
22.3137
21.5183
22.0809
22.1231
21.1824
21.9923
22.0809
21.8704
22.1231
22.1247
21.6549
22.0809
18.1606
22.0708
21.6549
22.0708
22.1075
17.2418
22.0708
17.6932
17.9841
22.1231
22.0809
17.299
22.0708
22.0708
22.0708
21.8704
21.4878
22.1231
22.1231
20.8124
22.1075
22.0708
22.2273
21.4878
22.0809
21.6549
22.0232
21.0057
21.8704
22.1231
22.0809
22.0232
22.0708
21.9923
21.8704
21.1824
21.9923
22.0232
22.0232
21.1824
17.4766
17.6619
22.0708
22.0708
18.1606
22.0232
20.6949
22.2273
22.3137
22.1075
21.6549
22.0708
22.1075
18.1585
20.8124
20.6949
22.2273
22.1231
18.7596
22.0708
20.4285
21.6549
20.8124
22.2273
22.1231
19.2166
17.4766
22.0232
21.4878
21.9923
21.5183
22.2273
21.5183
21.2727
21.2727
19.739
19.0134
19.9414
22.1247
22.1075
21.5183
21.6549
21.8704
22.0708
21.4878
21.1824
20.3648
17.2926
21.4878
19.8513
18.3533
22.5421
20.3648
22.0708
22.4765
20.8124
20.4285
22.1075
17.2418
17.2418
21.6549
17.2926
17.5015
18.3533
22.1231
21.8704
21.9923
22.0232
22.1231
22.0708
22.4953
22.0708
22.1075
21.6549
21.5183
22.1247
21.6549
19.9414
22.0232
17.2418
17.6932
22.4953
20.8124
17.2926
21.5183
18.1585
21.1824
21.5183
19.0134
19.739
17.2418
19.9414
18.1606
20.3648
21.4878
21.5183
17.6617
19.2166
18.6536
22.0708
17.5015
21.4878
21.9923
21.9923
22.2273
19.739
17.671
17.2926
21.6549
22.3137
22.4765
21.8704
17.5073
21.2727
17.6617
17.671
18.1585
17.671
22.0708
22.1247
20.8124
21.2727
19.2166
20.4285
17.5015
21.5183
20.3648
21.1824
21.6549
21.0057
22.1075
22.1231
21.9923
21.8704
22.0708
22.1247
22.1075
21.9923
22.1231
22.0809
21.8704
21.8704
22.0232
21.4878
21.9923
17.4766
17.5721
21.6549
19.2166
21.2727
21.9923
22.0708
17.2926
21.8704
22.0708
22.0809
22.0809
17.4766
19.9414
22.0232
22.0708
21.2727
17.5015
17.5073
20.8124
19.3306
21.2727
21.5183
18.5479
22.1075
22.1231
22.4953
21.8704
22.0232
19.3306
21.2727
21.9923
22.0809
21.9923
21.9923
19.0134
21.8704
21.8704
22.2273
22.0809
22.0232
22.0809
19.0134
21.5183
22.5421
22.6152
22.4953
22.0708
22.5421
22.9211
22.4765
22.5421
17.4766
22.5421
21.9923
22.6356
22.2273
21.4878
22.6356
22.0708
22.6356
22.5421
22.0809
22.4953
22.0708
22.4953
22.3137
22.4765
22.1231
22.0232
22.4765
22.3137
22.0809
22.1247
22.1231
22.1075
22.2273
22.1231
22.9211
22.1247
22.1247
20.3648
21.2727
22.1075
21.1824
22.4765
22.2273
22.2273
21.9923
22.2273
22.5421
22.5421
22.1075
22.3137
21.9923
22.1247
22.2273
17.4766
22.4765
22.2273
23.5298
22.6356
22.6356
22.1075
20.1807
21.4878
21.0057
22.0708
22.0708
17.671
20.8124
22.0708
21.2727
23.5298
21.1824
22.1075
21.8704
22.0708
21.0057
21.9923
21.1824
21.1824
21.9923
20.8124
22.1231
21.9923
22.0708
22.1075
21.1824
21.2727
21.6549
22.0809
20.8124
20.8124
22.0708
21.8704
21.8704
22.0809
22.0232
21.5183
20.6949
21.5183
21.1824
21.4878
21.1824
21.1824
19.8513
20.6949
22.0708
18.6536
22.0232
22.6152
21.1824
21.5183
18.1606
21.5183
21.5183
21.6549
19.8513
21.2727
20.3648
20.4285
19.0134
19.2166
21.9923
21.2727
22.0232
21.9923
22.0708
21.9923
21.8704
22.1075
22.0708
22.0809
21.5183
20.3648
19.3306
21.0057
21.6549
19.5233
21.5183
21.1824
17.9841
18.6536
17.9841
22.0809
21.1824
19.9414
22.0809
19.5233
21.5183
21.5183
17.6932
22.0708
21.9923
21.6549
22.3137
22.1075
22.1075
22.1231
21.5183
22.0708
21.6549
21.5183
21.5183
18.1606
22.1231
20.3648
22.1231
20.3648
19.739
21.4878
21.6549
21.5183
22.0232
21.9923
22.0809
20.3648
22.1075
22.1075
22.0708
19.8513
21.5183
22.0232
21.9923
22.1075
22.4765
21.5183
22.1075
22.0809
22.0809
22.1075
22.0809
22.1231
22.0232
20.3648
17.2926
19.9414
21.5183
20.3648
21.9923
21.6549
21.6549
17.299
20.8124
18.3533
21.9923
22.0809
21.9923
22.0232
22.1231
21.2727
22.0232
20.8124
21.5183
22.1231
22.1075
19.8513
22.0232
19.739
20.8124
20.3648
17.2418
20.6949
22.0232
22.1247
18.6536
22.2273
22.3137
22.2273
22.1247
22.1247
22.1075
22.0708
22.1247
22.1247
22.1231
21.9923
21.5183
21.5183
22.1247
22.0708
22.1075
22.0809
22.0232
22.1247
22.0232
21.4878
22.1231
22.0708
19.3306
21.0057
22.3137
22.2273
22.1231
22.4765
22.2273
22.3137
17.299
22.1247
22.0232
22.0708
20.3648
22.0809
22.1247
22.1075
21.9923
21.9923
21.4878
21.5183
22.4765
20.1807
21.9923
22.1247
21.0057
22.1247
22.2273
22.0809
18.3533
19.5233
21.5183
22.0232
22.1075
22.1231
21.8704
22.1247
20.4285
19.5233
17.5073
22.0232
21.5183
17.6932
22.0708
21.4878
22.0232
21.9923
20.6949
22.1231
20.8124
21.2727
20.8124
21.6549
22.1231
19.8513
22.0809
21.4878
21.5183
22.1231
21.9923
21.8704
22.0809
17.5015
22.4953
17.5015
17.5721
21.0057
21.2727
22.0232
21.9923
17.299
18.5479
19.739
18.5479
20.8124
17.6619
17.6619
23.1088
19.2166
20.4285
18.7596
21.9923
21.0057
21.5183
21.8704
20.8124
21.1824
20.3648
20.4285
20.3648
20.1807
21.5183
21.5183
19.739
20.6949
17.5073
17.9841
19.5233
21.2727
21.9923
20.3648
20.3648
19.9414
18.1585
20.1807
19.0134
18.1606
21.1824
21.1824
18.5479
20.1807
19.0134
21.5183
19.0134
17.2926
20.6949
18.1585
18.3533
18.1606
20.6949
17.671
18.6536
19.8513

## Sheet: Fig 3A
	Cre + Arch/Arch (n=20)																				Cre - Arch/Arch or Arch/+ (n=17)
490nm	4.77	4.63	5.1	5.73	4.9	5.13	6.35	5.3	4.82	5.15	4.22	5.45	4.28	4.42	4.37	4.87	4.42	4.67	5.2	4.92	5.65	5.38	4.62	5.18	4.28	4.47	4.92	4.3	3.98	4.33	4.1	4.12	4.72	4.63	4.23	4.78	4.68
590nm	6.03	6.8	6.73	8.25	7.02	6.67	8.13	6.5	6.37	5.97	5.82	6.93	6.12	6.53	6.02	6.5	6.62	6.83	6.57	6.92	5.83	5.25	4.82	6.22	4.32	4.18	4.48	4.38	3.97	4.82	4.9	4.3	5	4.2	4.35	4.2	4.65

## Sheet: Fig 3B
PBS	Apyrase
3.925	6.25
3.85	7.65
4.175	5.65
5.175	6.175
4.15	6.225
3.425	4.75
4.3	6.9
3.8	6.55
4.325	6.975
3.75	6.875
4.5	6.325
4	7.5

## Sheet: Fig 3C
Advlillin Cre+	Advillin Cre-
6.0625	4.3125
6.525	4.0375
6.05	4.2875
6.0375	3.925
6.0375	4.275
5.6375	4.6875
7.2125	3.7
6.3125	4.1625
6.3625	4.3125
6.7875	4.0875
6.2	4.0625
	3.975

## Sheet: Fig 3D
	AdvCre- P2X4								AdvCre+ P2X4
30C	55	47.67	55.67	47.33	54.33	54.33			51.67	39.67	53.33	50	48.67	36.67	43	46
26C	43.67	51.67	42.33	41.33	61.67	54.67			66.67	43.67	52.33	50.33	48	43.33	59.67	41.33
23C	39.67	32.33	21.67	28.33	36	22.67			44.67	43.67	50	54	49.33	52	44.67	60.67
20C	11.67	27	8	20.33	11.33	34			64	49	44.67	52	43.33	48	42.67	39
17C	6.33	12.33	10.667	13.33	14	17			20.33	24.33	58.67	36.67	51.67	25.67	27	42

[truncated: 3 more sheets: Fig 4A, Fig 4B, Fig 4C]
